# Supplementary material for: Marine Collagen Hydrolysates Promote Collagen Synthesis, Viability and Proliferation While Downregulating the Synthesis of Pro-Catabolic Markers in Human Articular Chondrocytes
Source: MDPI journal article supplement (doi:10.3390/ijms22073693), 2021-04-01
Supplement: s1 [file s1]

# Marine Collagen Hydrolysates Promote Collagen Synthesis, Viability and Proliferation While Downregulating the Synthesis of Pro-Catabolic Markers in Human Articular Chondrocytes

Bastien Bourdon <sup>1,2</sup>, Frédéric Cassé <sup>1</sup>, Nicolas Gruchy <sup>1,3</sup>, Pierre Cambier <sup>1</sup>, Sylvain Leclercq <sup>4</sup>, Sarah Oddoux <sup>2</sup>, Antoine Noël <sup>2</sup>, Jérôme Lafont <sup>5</sup>, Romain Contentin <sup>1,†</sup> and Philippe Galéra <sup>1,\*,†</sup>

<sup>1</sup> BIOTARGEN, Normandie University, UNICAEN 14000 Caen, France;  
bastien.bourdon@unicaen.fr (B.B.); frederic.casse@unicaen.fr (F.C.);  
nicolas.gruchy@unicaen.fr (N.G.); 21507655@etu.unicaen.fr (P.C.);  
contentinr@email.chop.edu (R.C.); philippe.galera@unicaen.fr (P.G.)

<sup>2</sup> Dielen laboratory, 50110 Tournelville, France; sarah-oddoux@dielen.fr (S.O.); antoine-noel@dielen.fr (A.N.)

<sup>3</sup> Department of Genetics, Normandy Center for Genomic and Personalized Medicine, Caen University Hospital, 14000 Caen, France

<sup>4</sup> Service de Chirurgie Orthopédique, Clinique Saint-Martin, 14000 Caen, France ;  
sylvainleclercq60@gmail.com

<sup>5</sup> CNRS UMR 5305, Laboratory of Tissue Biology and Therapeutic Engineering, University Claude Bernard Lyon 1, Univ Lyon, 69367 Lyon, France;  
jerome.lafont@ibcp.fr

\* Correspondence: philippe.galera@unicaen.fr

† These authors contributed equally to this work.

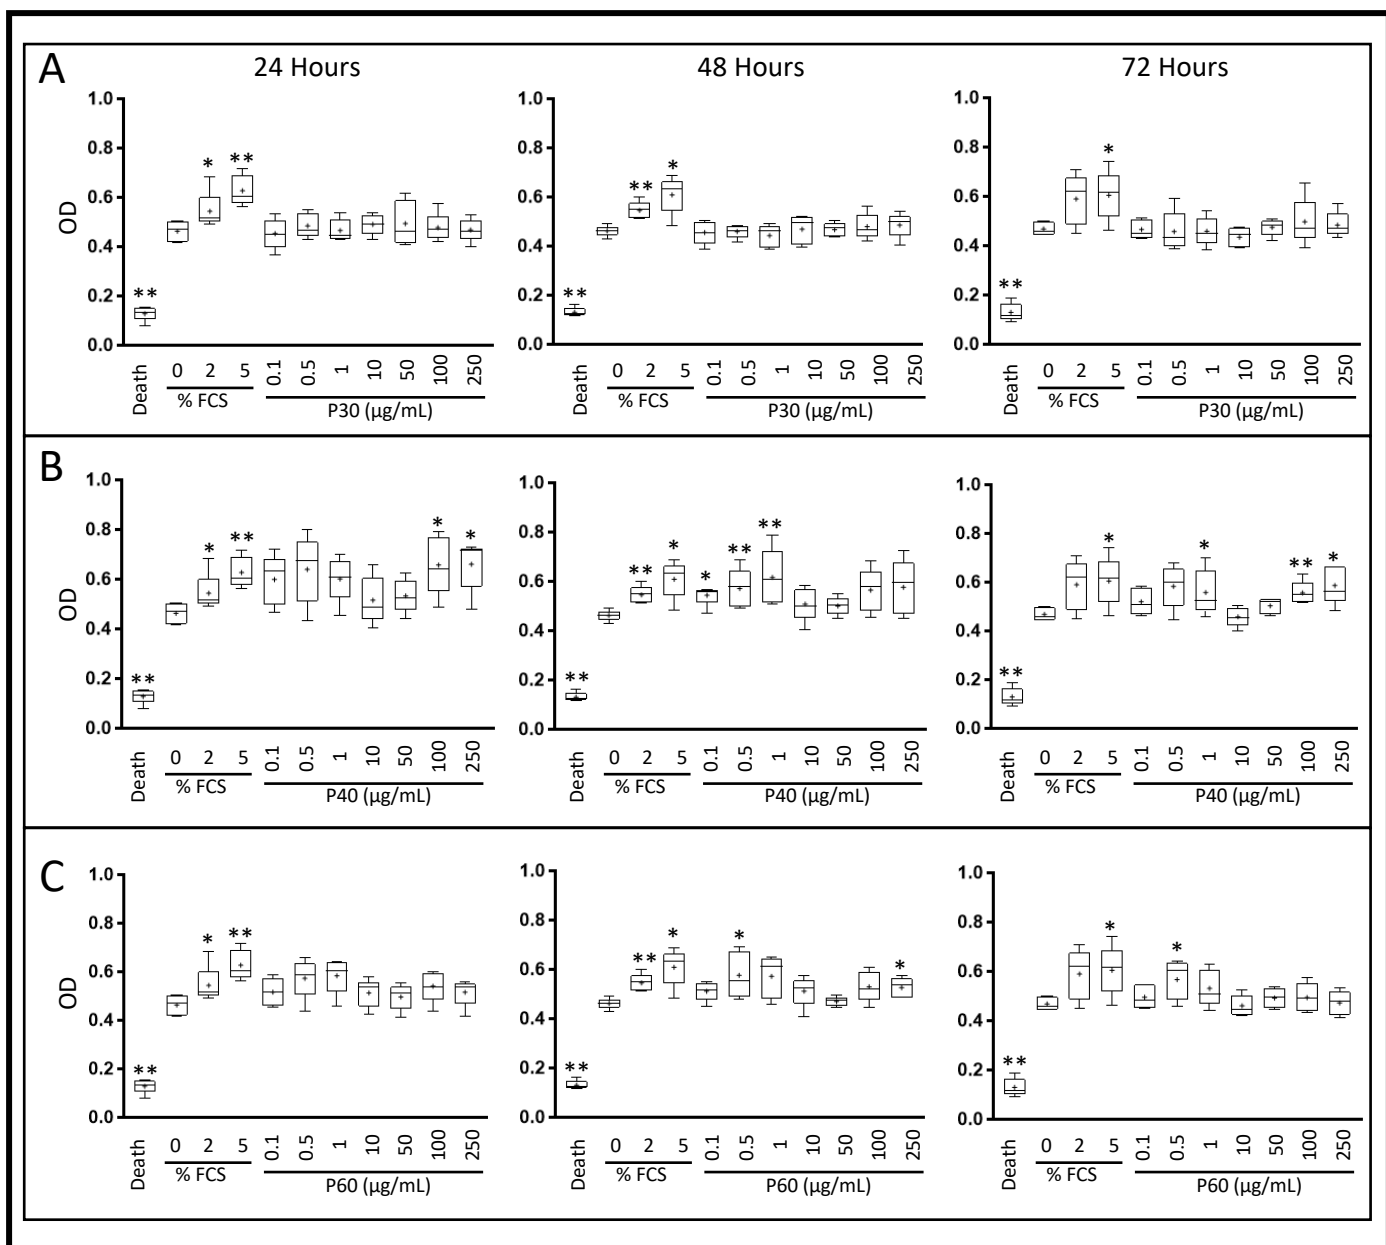

**Figure S1: Effect of Promerim® hydrolysates on the viability and proliferation of human articular chondrocytes.**

Human articular chondrocytes at P2 and 80% confluency were treated in the absence of FCS, with 0.1, 0.5, 1, 10, 50, 100 or 250 µg/mL Promerim®30 (A), 40 (B) or 60 (C) for 24, 48 and 72 hours in normoxia. Controls with 0%, 2% and 5% FCS, and a positive control of 100% cell death (Triton-induced death) were performed. Formazan levels, which are correlated with viability and proliferation, were measured in the media after 24, 48 and 72 hours of treatment. Results are summarized in box-plots (n= 5) showing the mean (cross) and the median (line) of optical density (OD). Statistical analyses were performed using the Mann-Whitney test (\* p<0.05; \*\* p<0.01) compared with the 0% FCS condition.

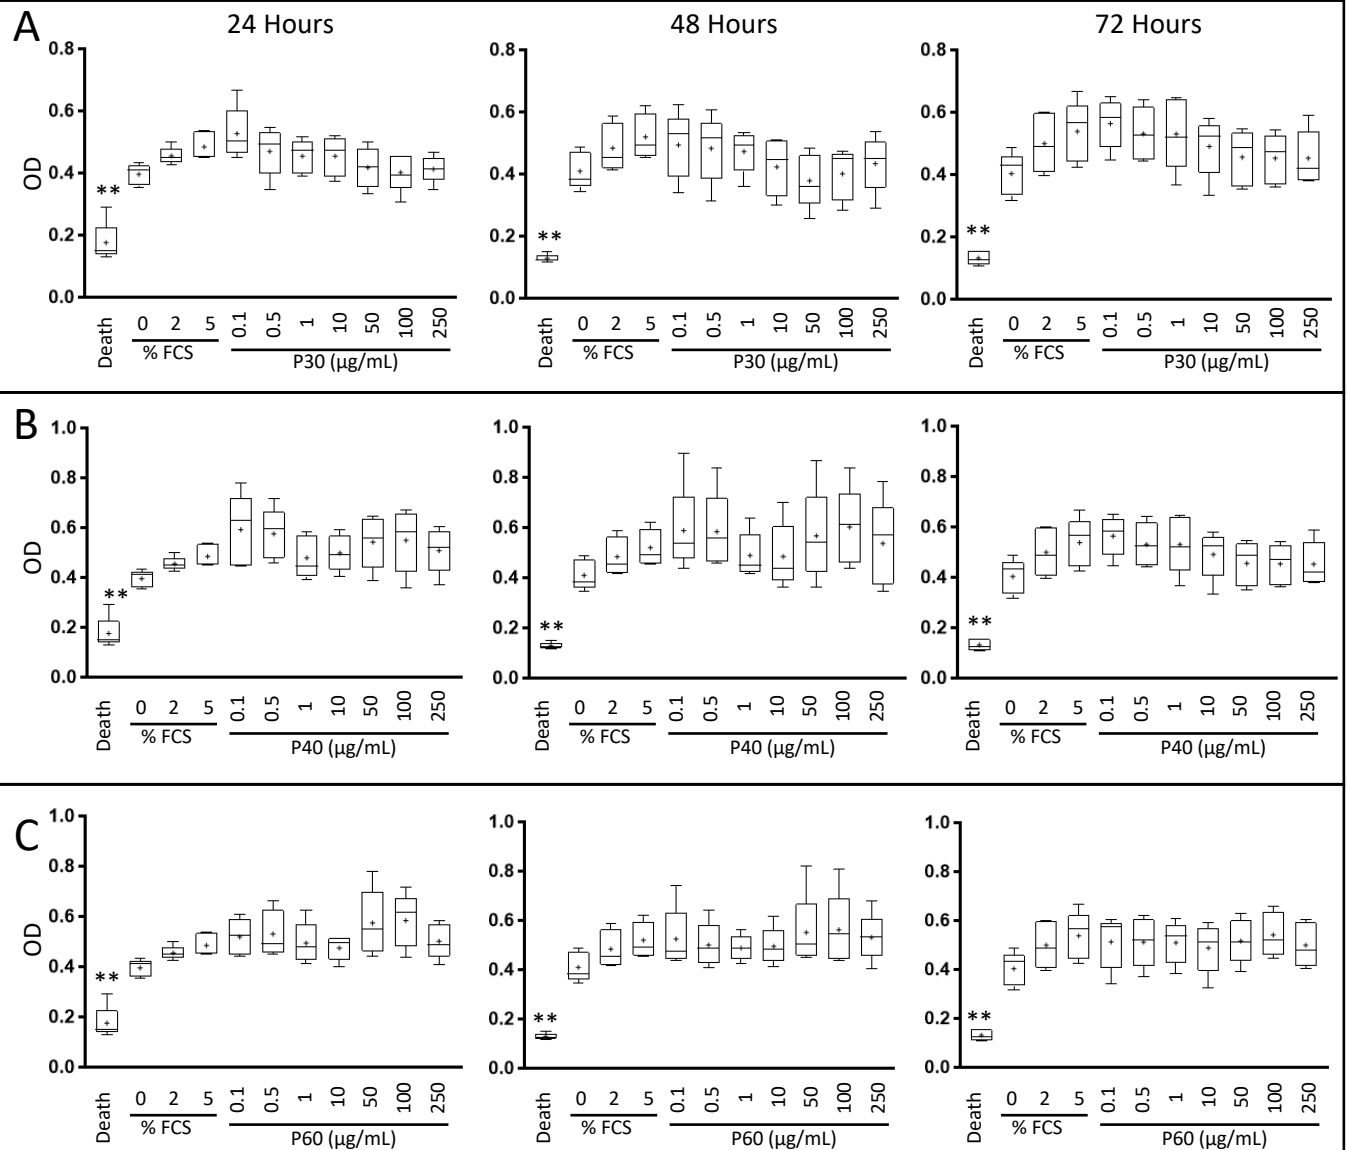

**Figure S2: Effect of Promerim® hydrolysates on the viability and proliferation of human articular chondrocytes.**

Human articular chondrocytes at P2 and 80% confluency were treated in the presence of 2% FCS, with 0.1, 0.5, 1, 10, 50, 100 or 250 µg/mL Promerims®30 (A), 40 (B) and 60 (C) for 24, 48 and 72 hours in normoxia. Controls with 0%, 2% and 5% FCS, and a positive control of 100% cell death (Triton-induced death) were performed. Formazan levels, which are correlated with viability and proliferation, were measured in the media after 24, 48 and 72 hours of treatment. Results are summarized in box-plots (n= 5) showing the mean (cross) and the median (line) of optical density (OD). Statistical analyses were performed using the Mann-Whitney test (\*\* p<0.01) compared with the 2% FCS condition.

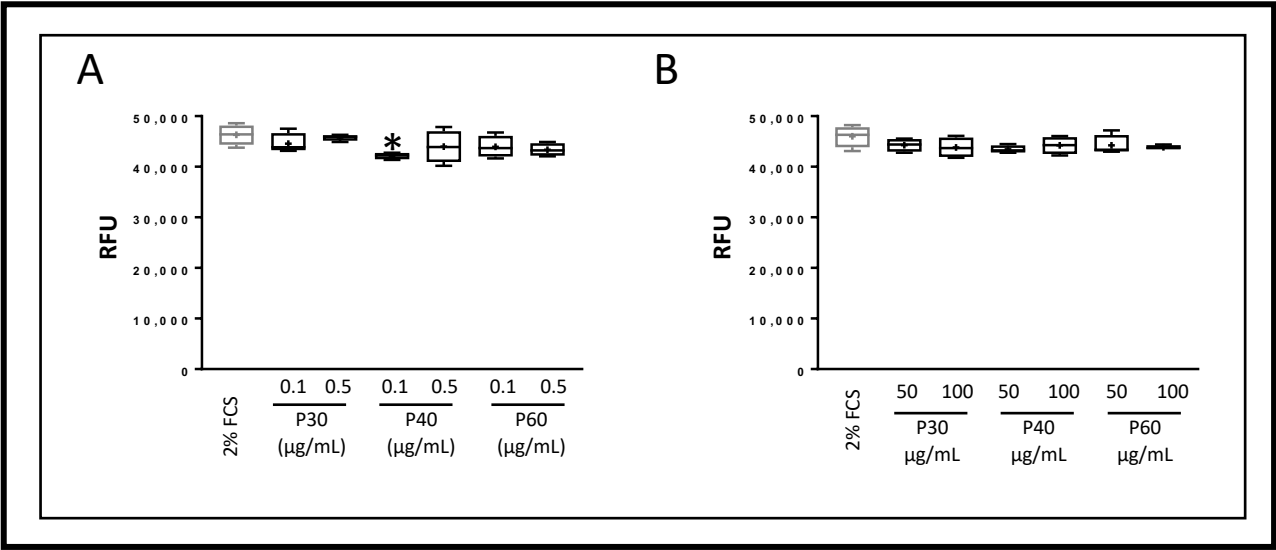

**Figure S3: Effect of Promerim® 30, 40 and 60 on the senescence of human articular chondrocytes.**

Human articular chondrocytes at P2 and 80% confluency were treated in the presence of 2% FCS, with Promerim® hydrolysates (P30, P40 and P60) at 0.1 and 0.5  $\mu\text{g/mL}$  (A), 50 and 100  $\mu\text{g/mL}$  (B) for 72 hours in normoxia. Controls with 2% FCS were performed (Ctrl) and the levels of  $\beta$ -galactosidase were measured 3 days post-treatment. Results are summarized in box-plots (n= 4) showing the mean (cross). Statistical analyses were performed using the Mann-Whitney test (\*  $p<0.05$ ) and the control condition was used as the reference.



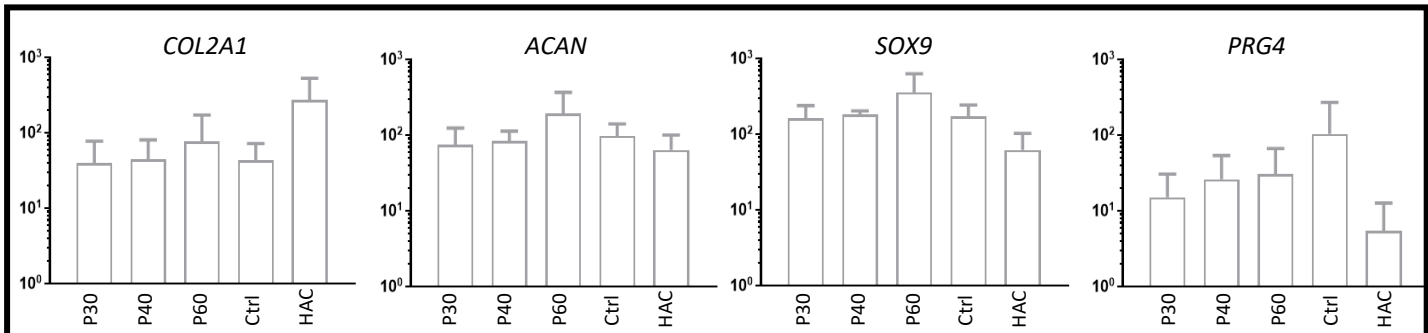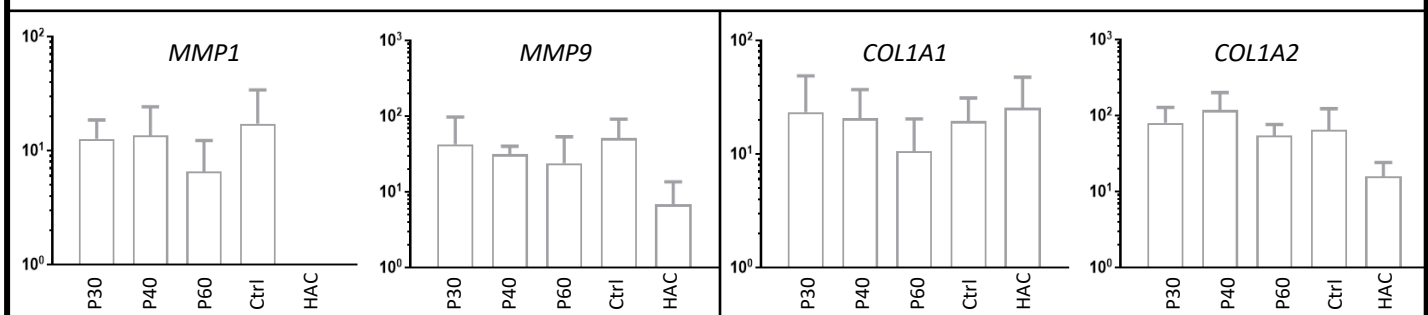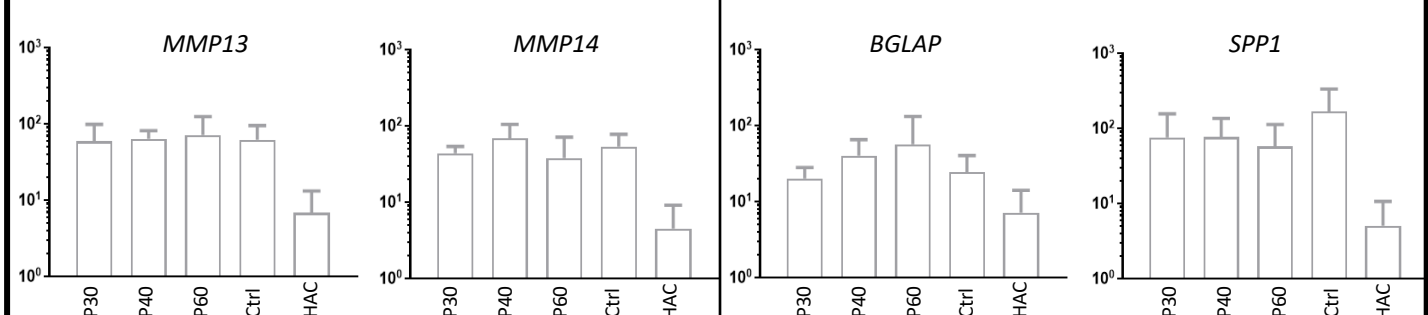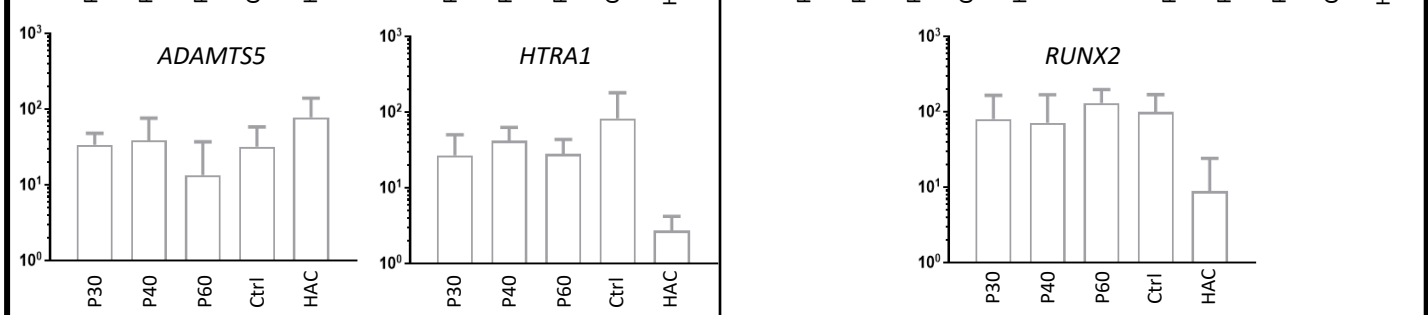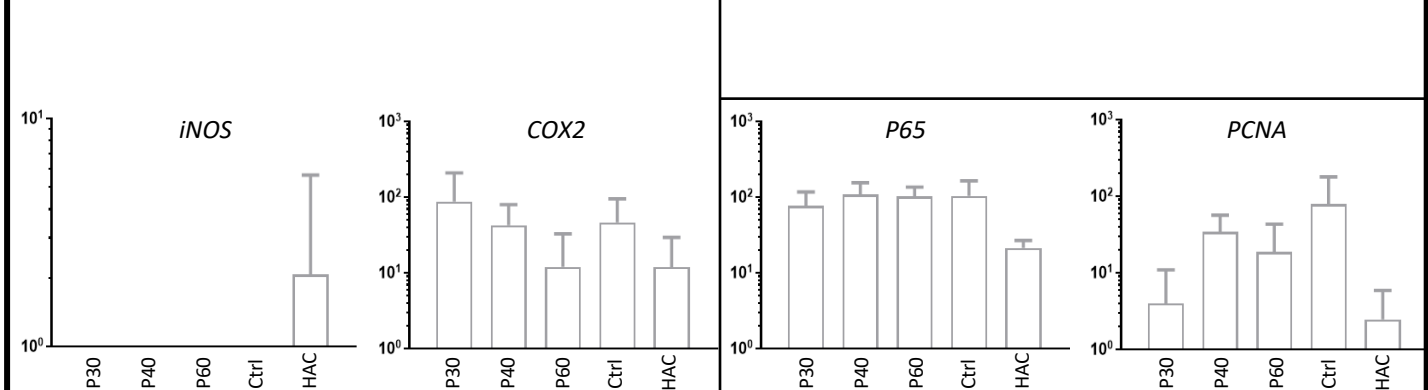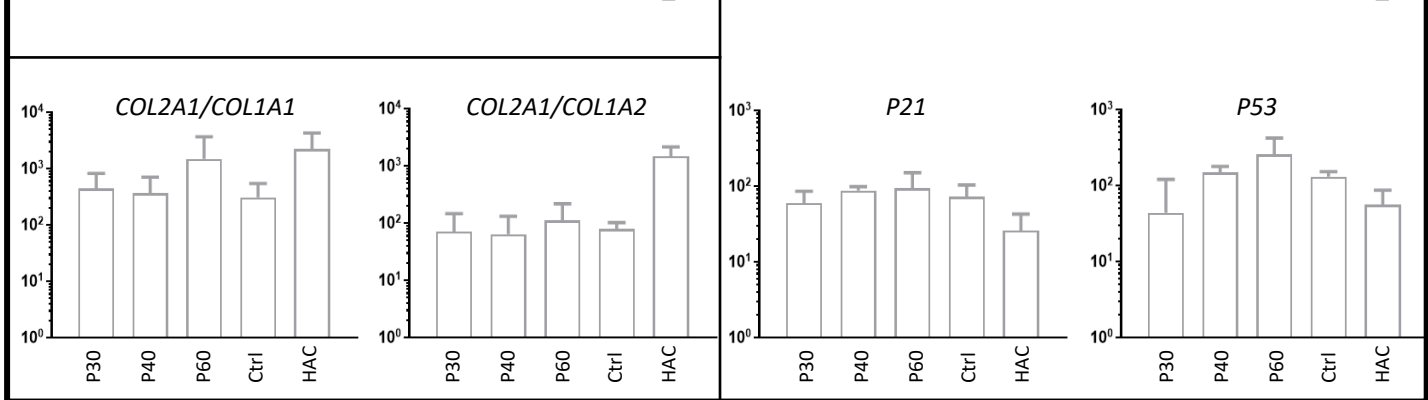

**Figure S4: Effect of low concentrations of Promerim®30, 40 and 60 on gene expression profile in human articular chondrocytes.** Human articular chondrocytes were grown in type I/III collagen sponges at (P2) for 7 days in hypoxia in the absence (Ctrl: control) or presence of Promerim®30, 40 or 60 at 0.1 µg/mL (P30, P40 and P60). Results are represented as histograms (n= 3) showing the mean ± SE of relative mRNA expression estimated using RT-qPCR and normalized to the *β-ACTIN* and *PPIA* reference gene. The *COL2A1:COL1A1* and *COL2A1:COL1A2* ratios are given. HAC: mRNA obtained from human articular chondrocytes at P0 were used as controls. Statistical analyses were performed using the Mann-Whitney test compared with the control condition.

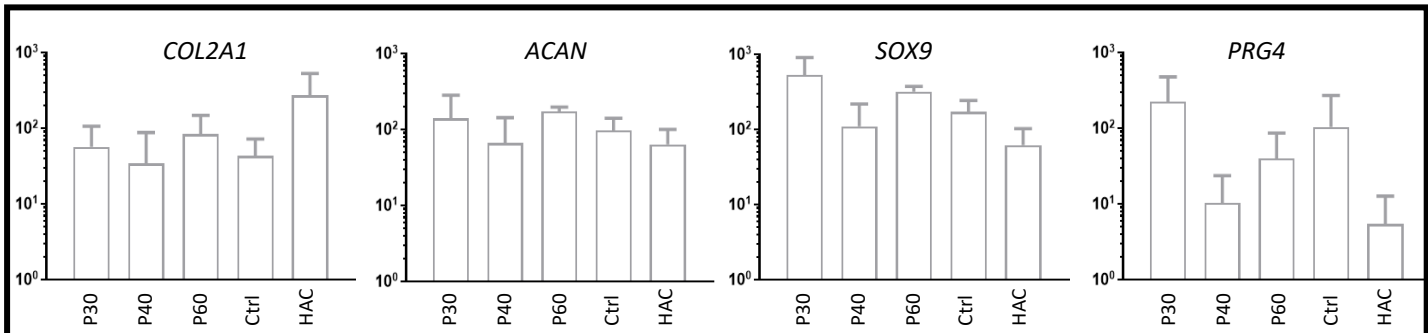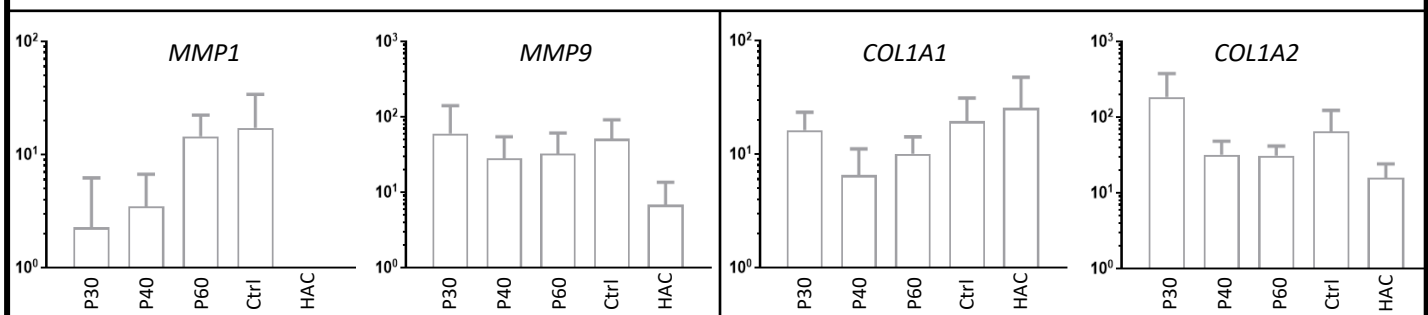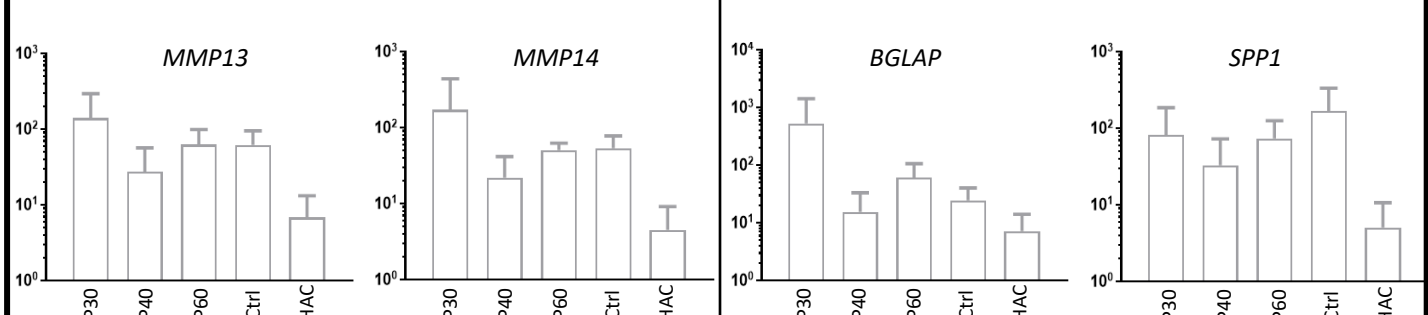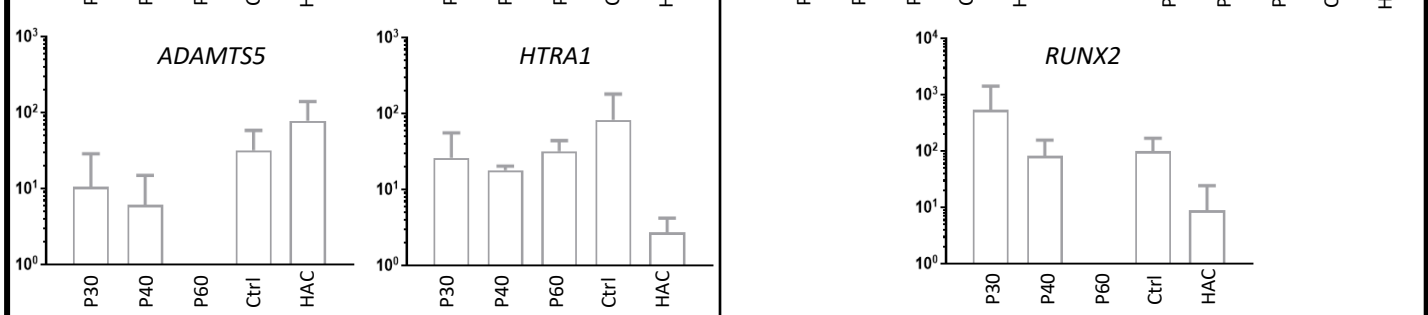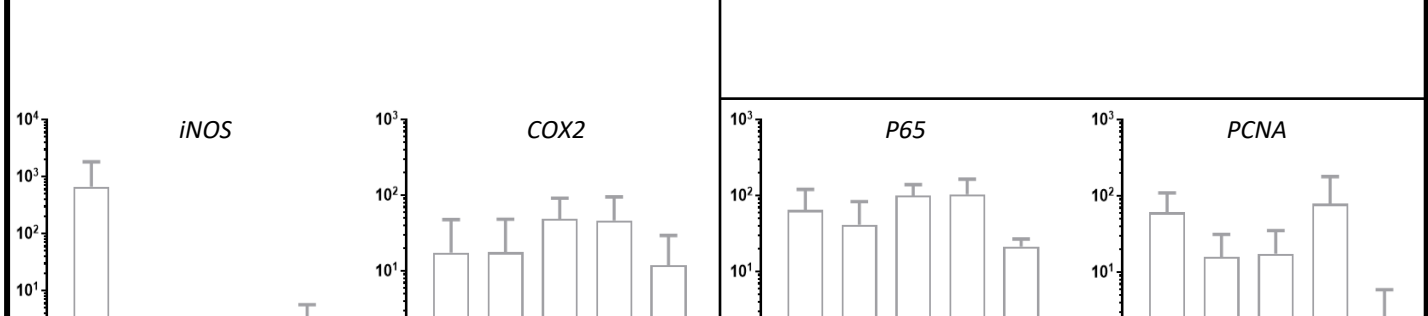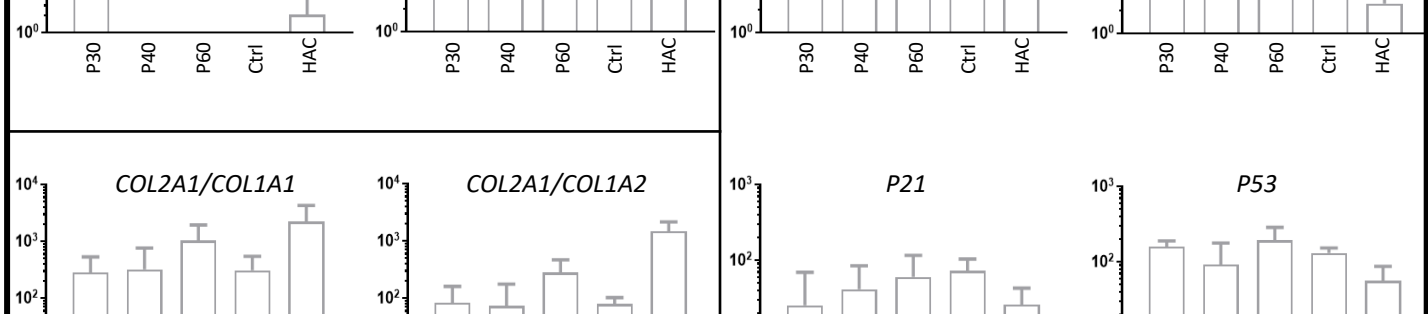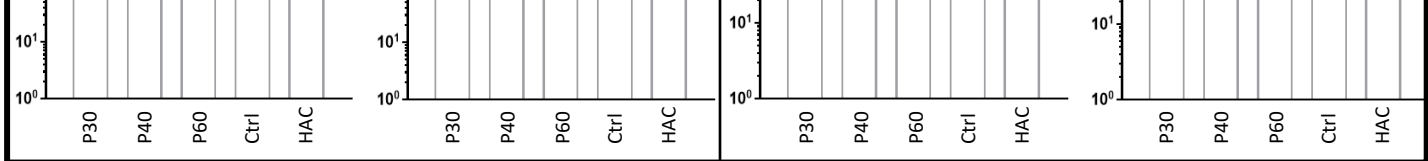

**Figure S5: Effect of low concentrations of Promerim®30, 40 and 60 on gene expression profile in human articular chondrocytes.** Human articular chondrocytes were grown in type I/III collagen sponges at (P2) for 7 days in hypoxia in the absence (Ctrl: control) or presence of Promerim®30, 40 or 60 at 0.5 µg/mL (P30, P40 and P60). Results are represented as histograms (n= 3) showing the means ± SE of relative mRNA expression estimated using RT-qPCR and normalized to the *β-ACTIN* and *PPIA* reference gene. The *COL2A1:COL1A1* and *COL2A1:COL1A2* ratios are given. HAC: mRNA obtained from human articular chondrocytes at P0 were used as controls. Statistical analyses were performed using the Mann-Whitney test compared with the control condition.

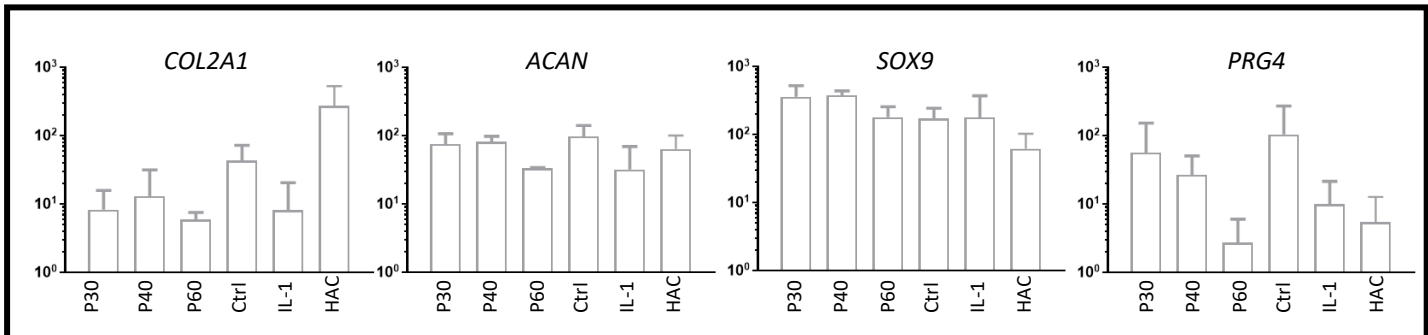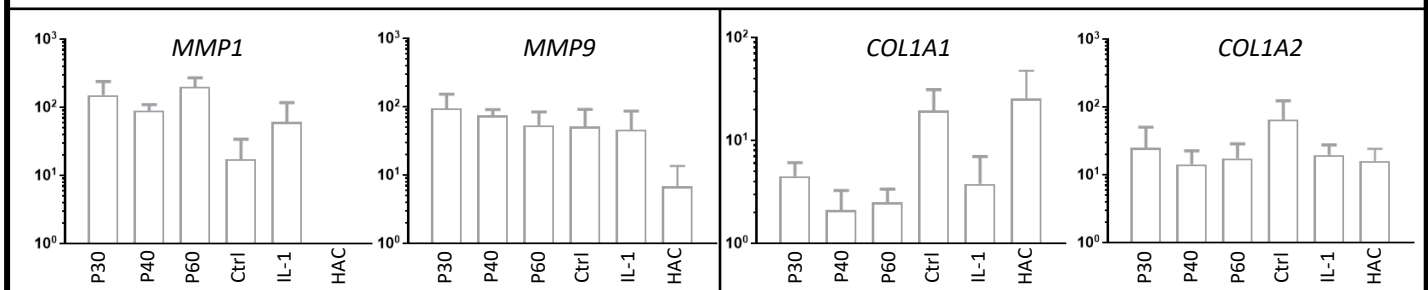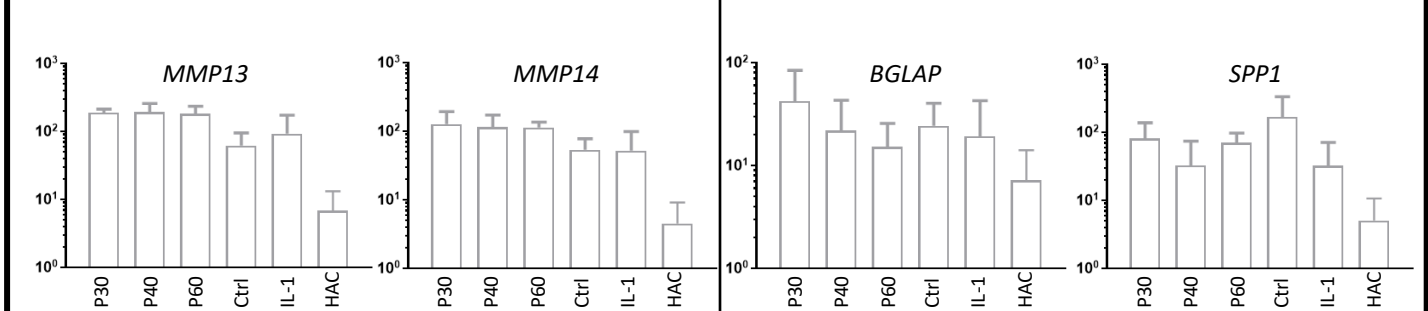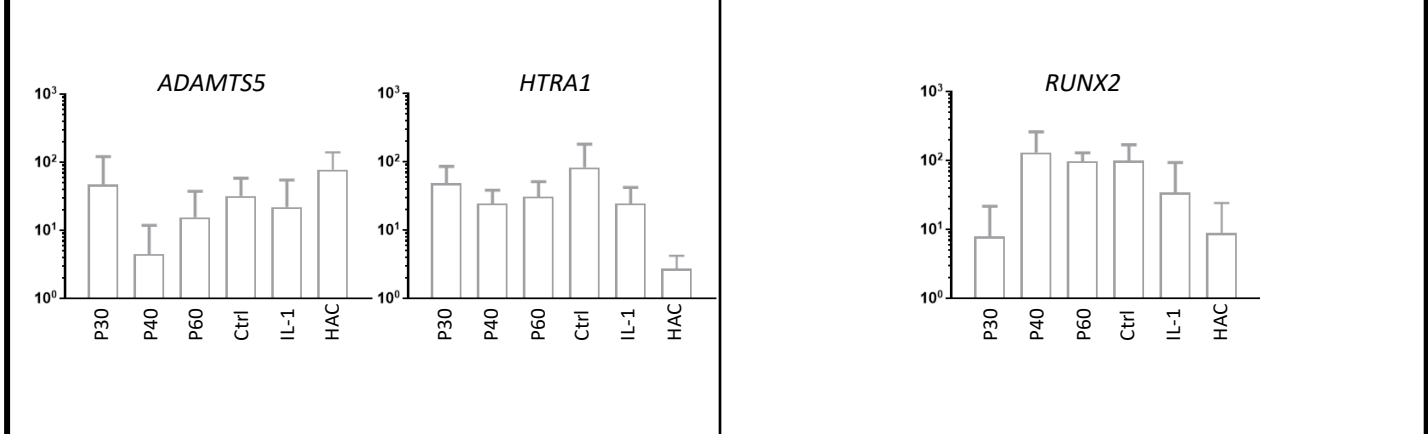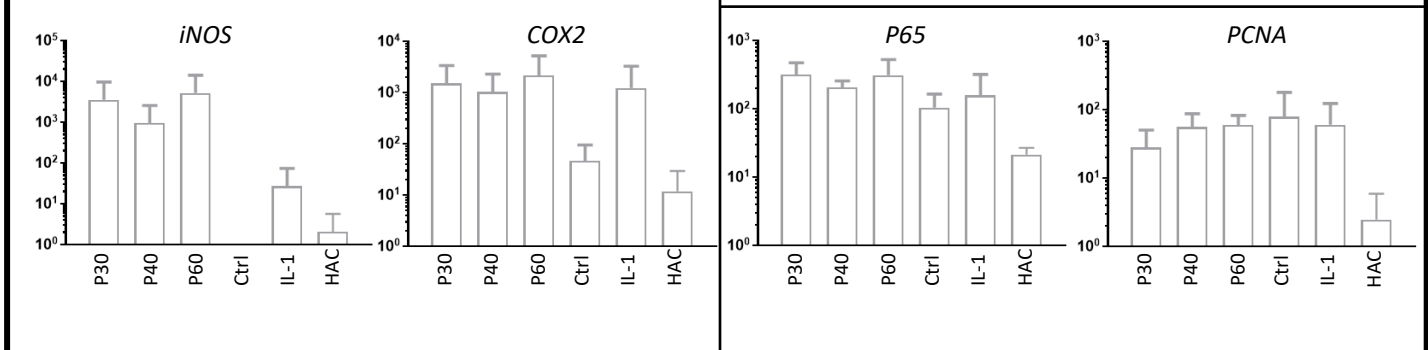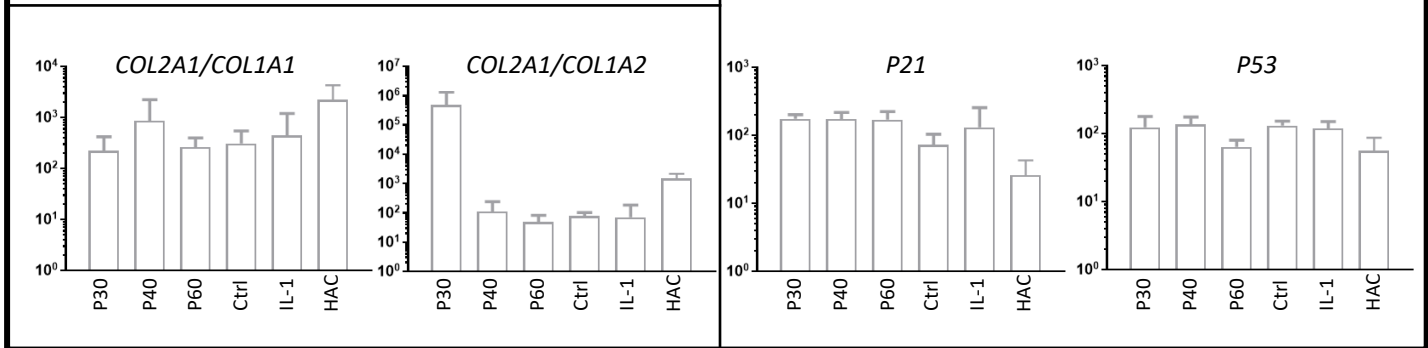

**Figure S6: Effect of low concentrations of Promerim®30, 40 and 60 on gene expression profile in human articular chondrocytes.** Human articular chondrocytes were grown in type I/III collagen sponges at (P2) for 7 days in hypoxia, treated with IL-1 $\beta$  (10 ng/mL) or without (Ctrl: control) and/or the presence of Promerim®30, 40 or 60 at 0.1  $\mu$ g/mL (P30, P40 and P60). Results are represented as histograms (n= 3) showing the means  $\pm$  SE of relative mRNA expression estimated using RT-qPCR and normalized to the  $\beta$ -*ACTIN* and *PPIA* reference gene. The *COL2A1:COL1A1* and *COL2A1:COL1A2* ratios are given. HAC: mRNA obtained from human articular chondrocytes at P0 were used as controls. Statistical analyses were performed using the Mann-Whitney test compared with the IL-1 condition.

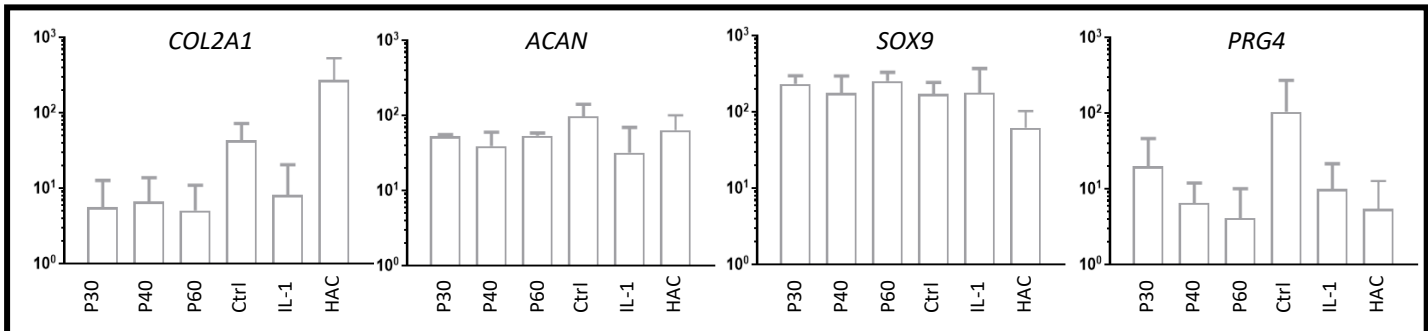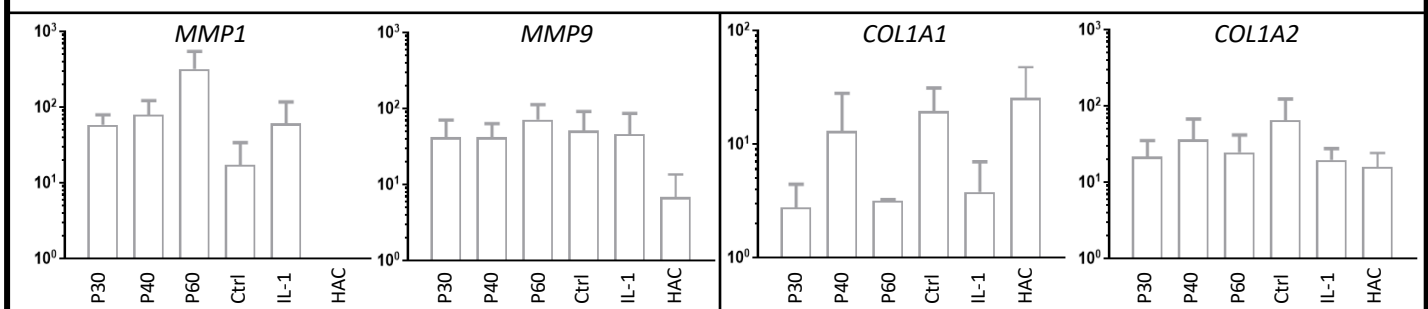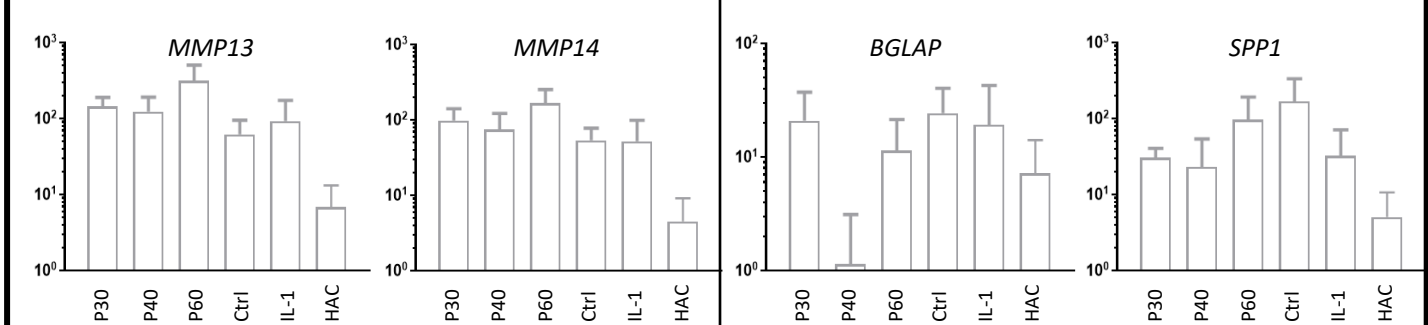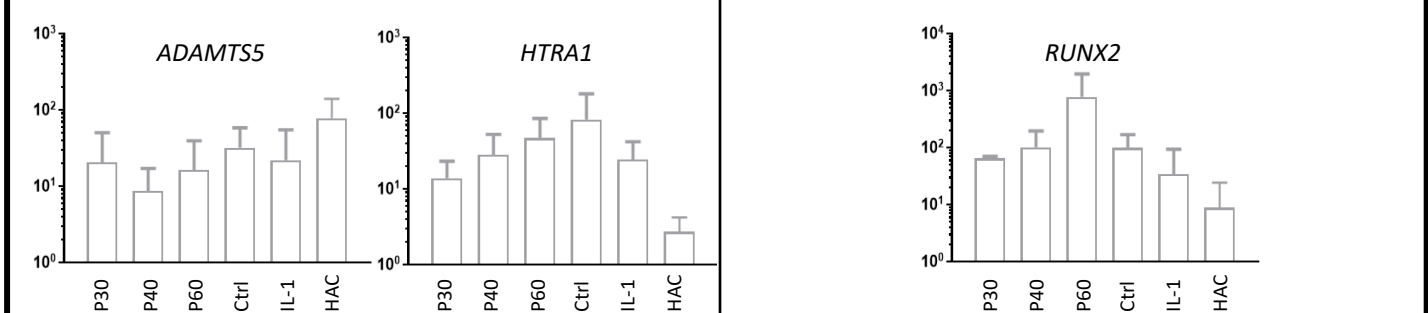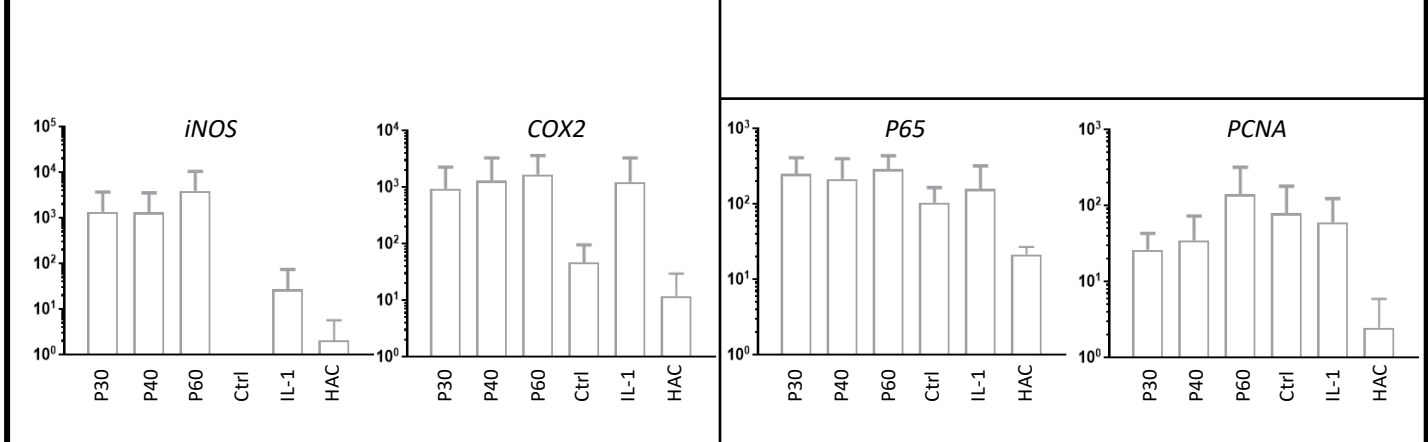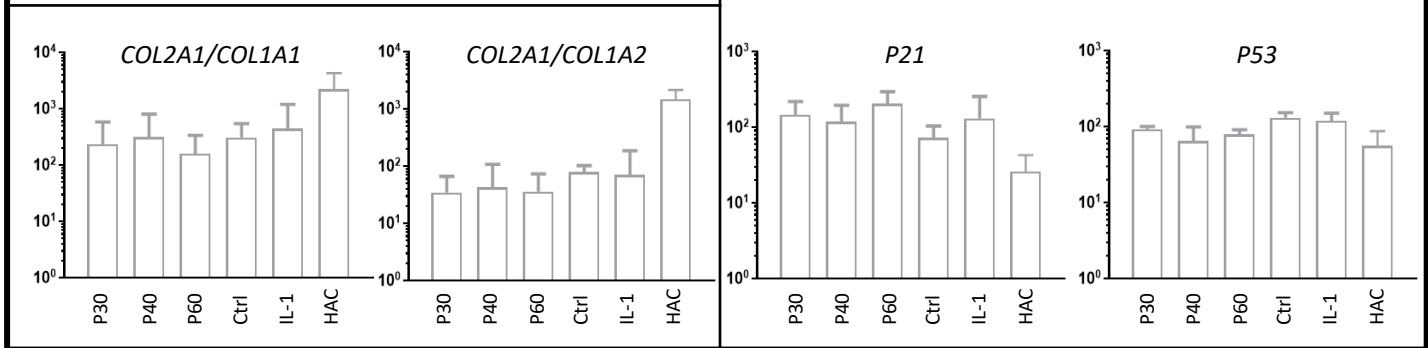

**Figure S7: Effect of low concentrations of Promerim®30, 40 and 60 on gene expression profile in human articular chondrocytes.** Human articular chondrocytes were grown in type I/III collagen sponges at (P2) for 7 days in hypoxia, treated with IL-1 $\beta$  (10 g/mL) or not (Ctrl: control) and/or the presence of Promerim®30, 40 or 60 at 0.5  $\mu$ g/mL (P30, P40 and P60). Results are represented as histograms (n= 3) showing the mean  $\pm$  SE of relative mRNA expression estimated using RT-qPCR and normalized to the  *$\beta$ -ACTIN* and *PPIA* reference gene. The *COL2A1:COL1A1* and *COL2A1:COL1A2* ratios are given. HAC: mRNA obtained from human articular chondrocytes at P0 were used as controls. Statistical analyses were performed using the Mann-Whitney test compared with the IL-1 condition.



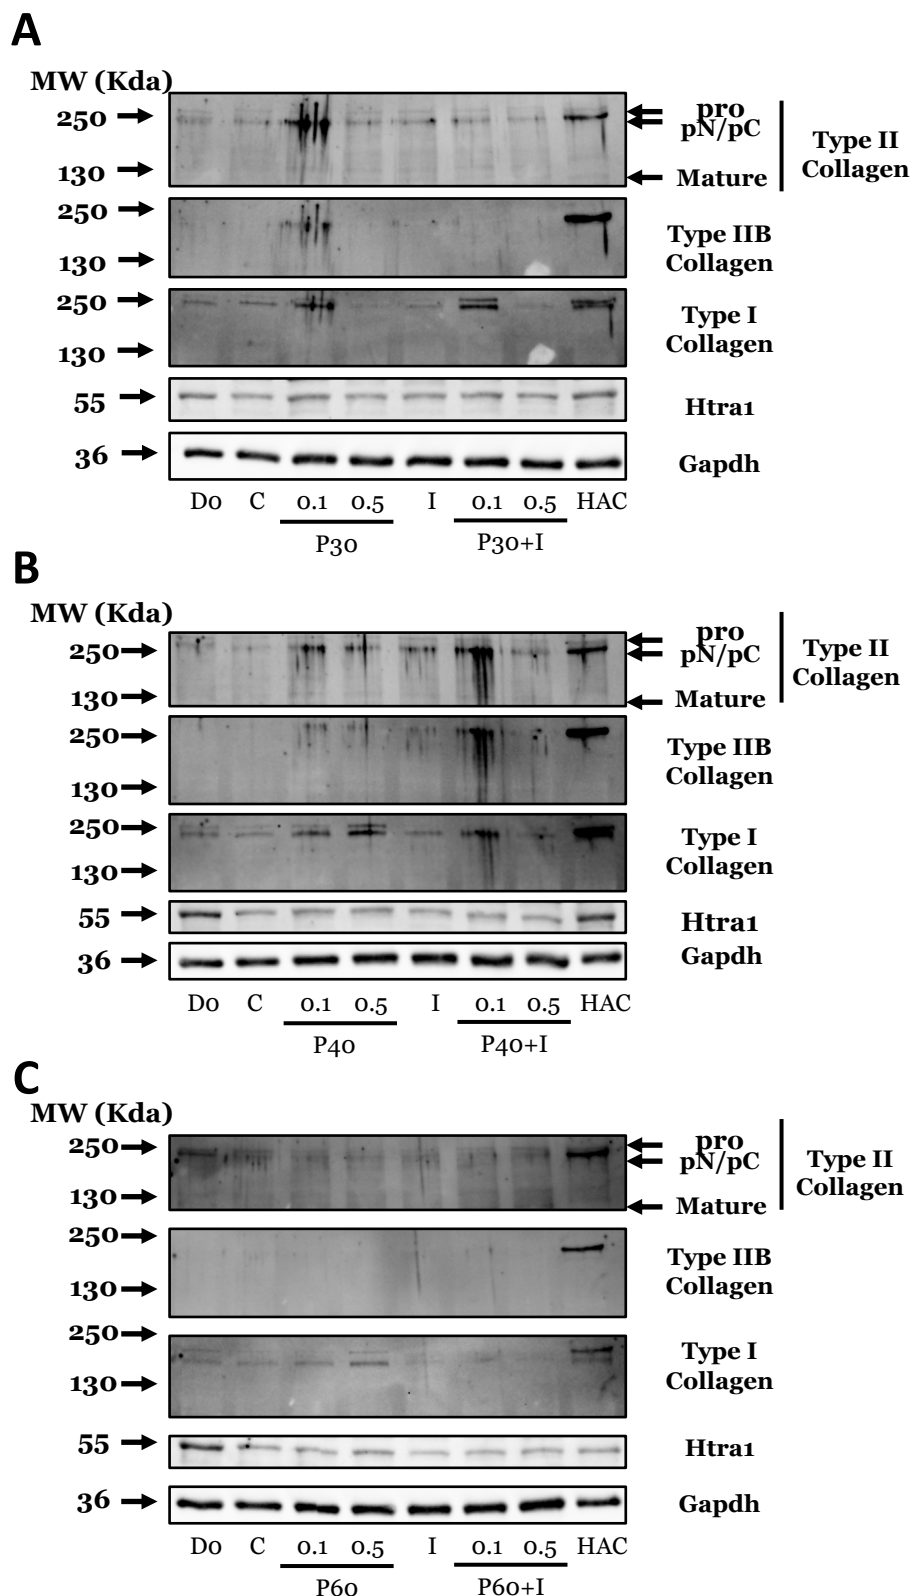

**Figure S8: Effect of low concentrations of Promerim® on collagens and Htra1 protein expression of human articular chondrocytes.** Human articular chondrocytes at P2 were inoculated in collagen sponges and treated for 7 days in the absence or presence of IL-1 $\beta$  (10 ng/mL) with Promerim®30 (A), 40 (B) or 60 (C) at 0.1 and 0.5  $\mu$ g/mL. The 3D control culture medium was used as control (C). I (IL-1), P30 (Promerim®30), P40 (Promerim®40), P60 (Promerim®60). Cells seeded in sponges stopped at day 0 (D0) and protein extracts obtained from human articular cartilage (HAC). The molecular weights expressed in kDa are shown on the left-hand side of the panels and the target proteins on the right-hand side of the panels. Images show representative immunoblots from different HAC strains (at least n= 3). Full membranes are shown in figure S14 as well as under-exposed and over-exposed blots in figures S15 and S16, respectively.



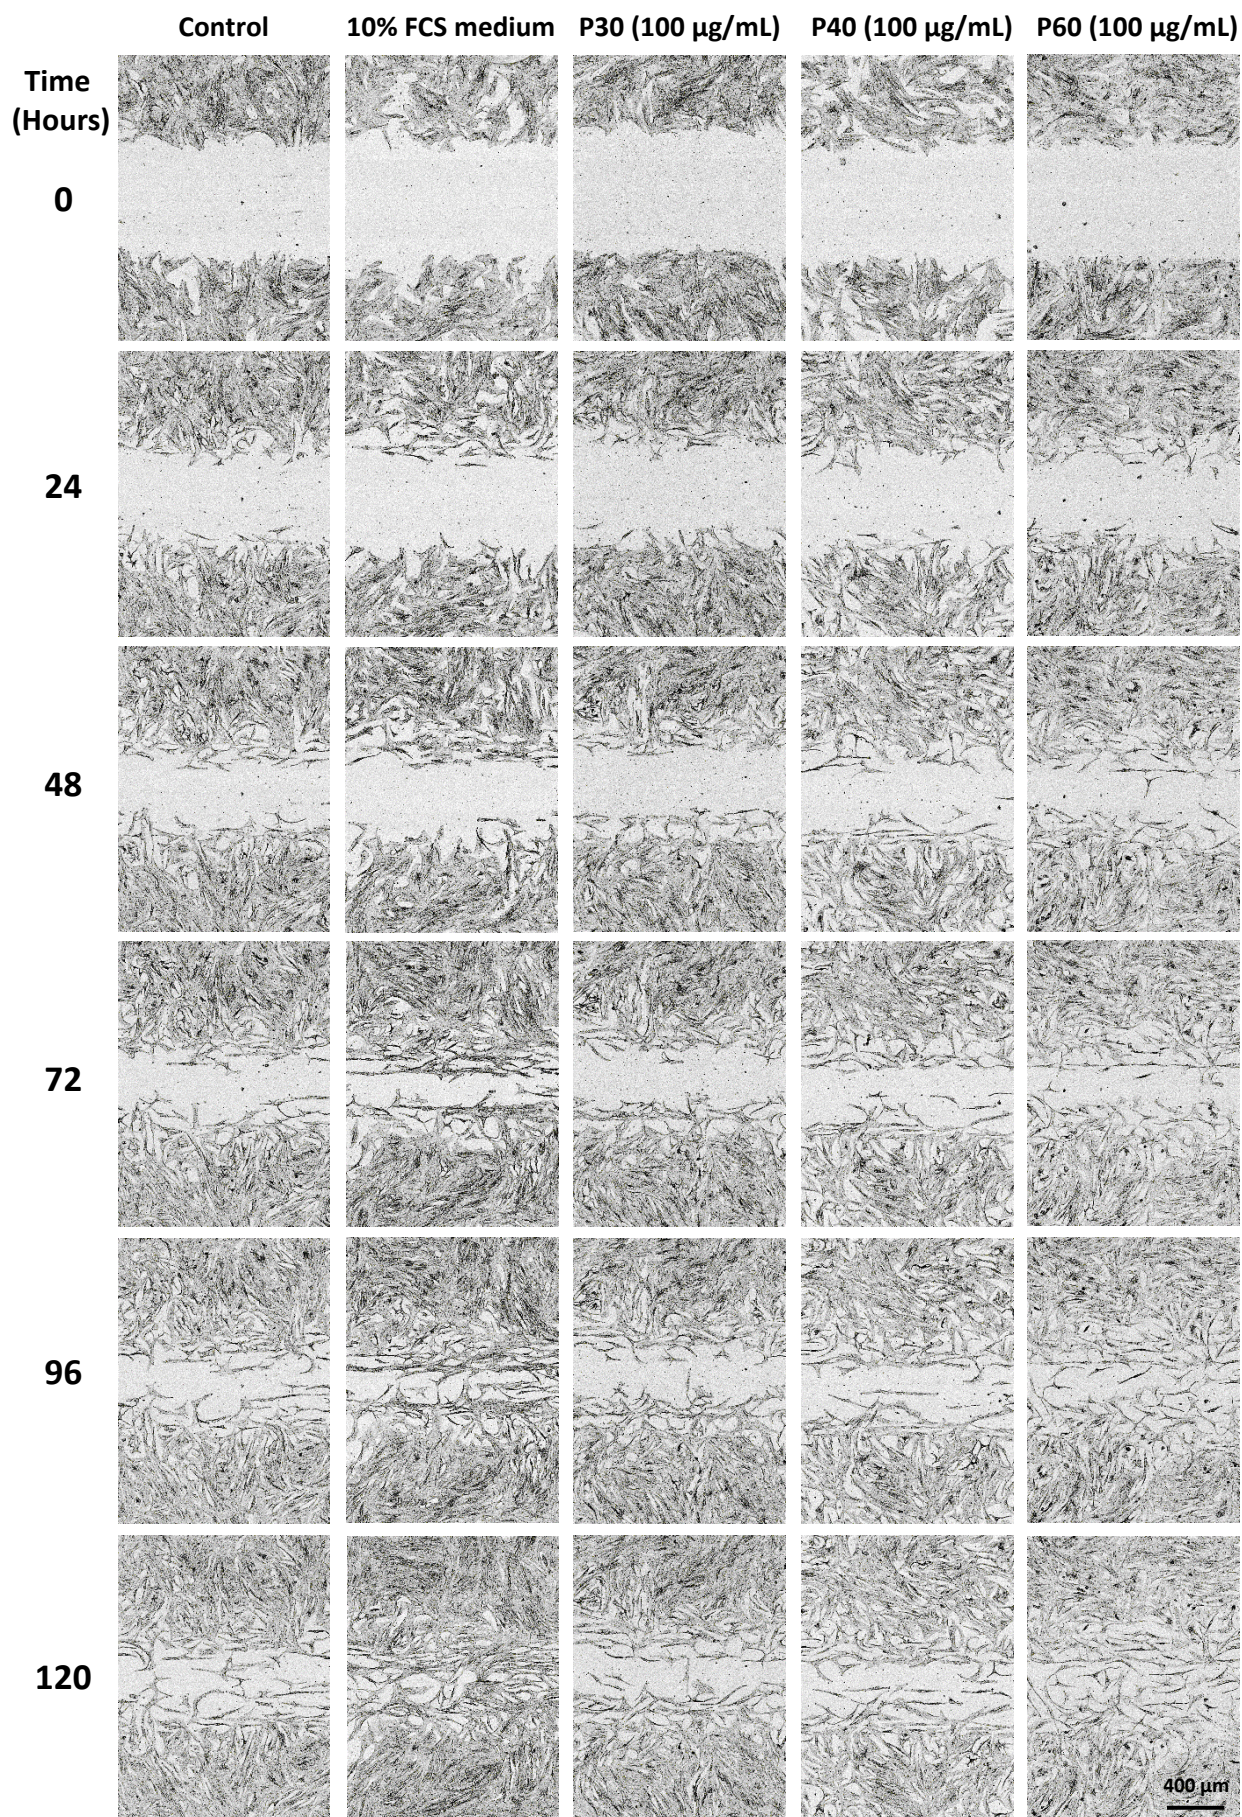

**Figure S9: Microscopy of wound filling analysis following a scratch wound assay.** Microscopy of human articular chondrocytes seeded at P2. At 90% confluency, a scratch wound assay was performed using a WoundMaker™ kit (Essen BioScience) and then the treatments were added. HACs were incubated in the presence of a culture medium containing 2% FCS (Control), and P30, P40, or P60 at 50 and 100  $\mu\text{g/mL}$ . P30, P40 and P60: Promerim®30, Promerim®40 and Promerim®60.



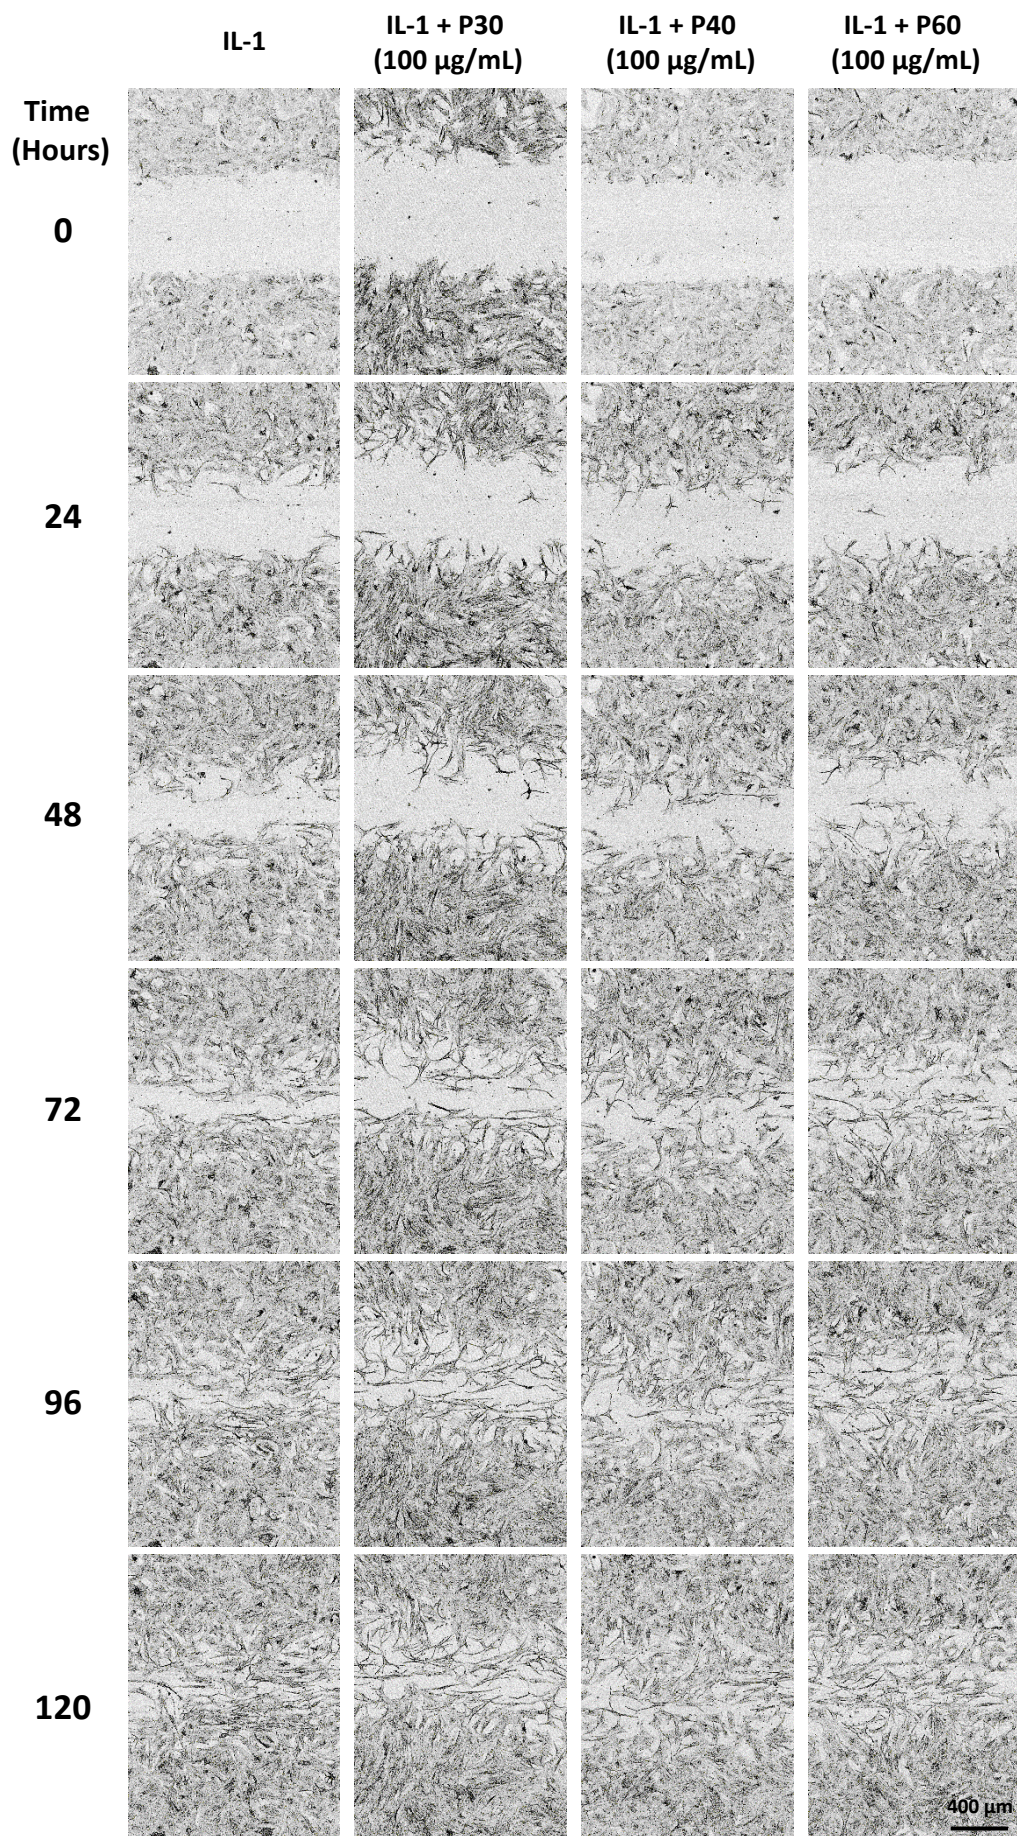

**Figure S10: Microscopy of wound filling analysis following a scratch wound assay.** Microscopy of human articular chondrocytes seeded at P2. At 90% of confluency, a scratch wound assay was performed using a WoundMaker™ kit (Essen BioScience) and then the treatments were added. HACs were incubated in the presence of a culture medium containing 2% FCS (Control), and P30, P40, or P60 at 50 and 100 µg/mL with IL-1. P30, P40 and P60: Promerim®30, Promerim®40 and Promerim®60.



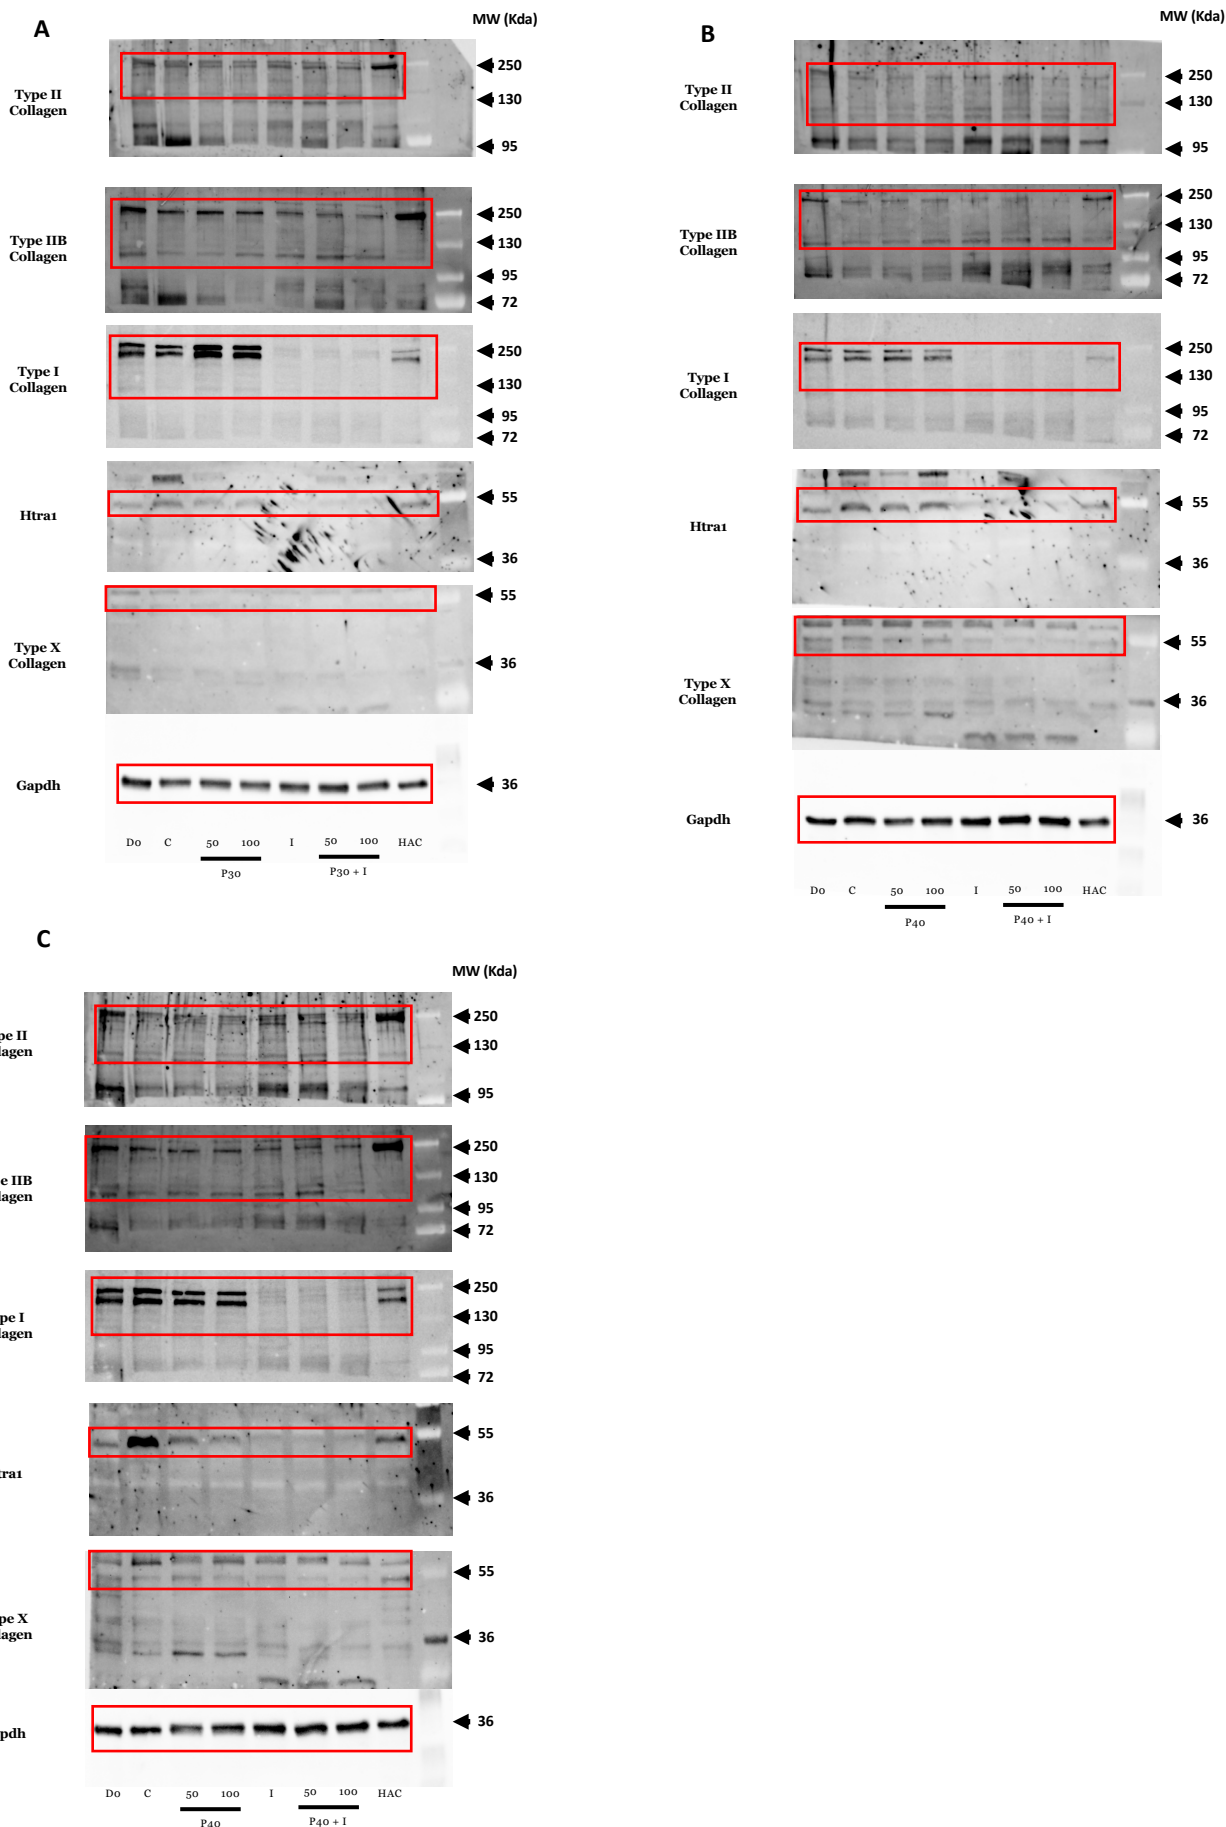

**Figure S11: Complete gel and PVDF membranes analyzed in the western-blots.**

For the western-blots presented in figure 10, respectively A, B and C, the complete images of the membranes captured with Chemidoc MP Imaging System (Bio-Rad) are shown. The molecular weight marker (MW kDa) is indicated on the right for the images shown. The cropped images are highlighted in the red lines.

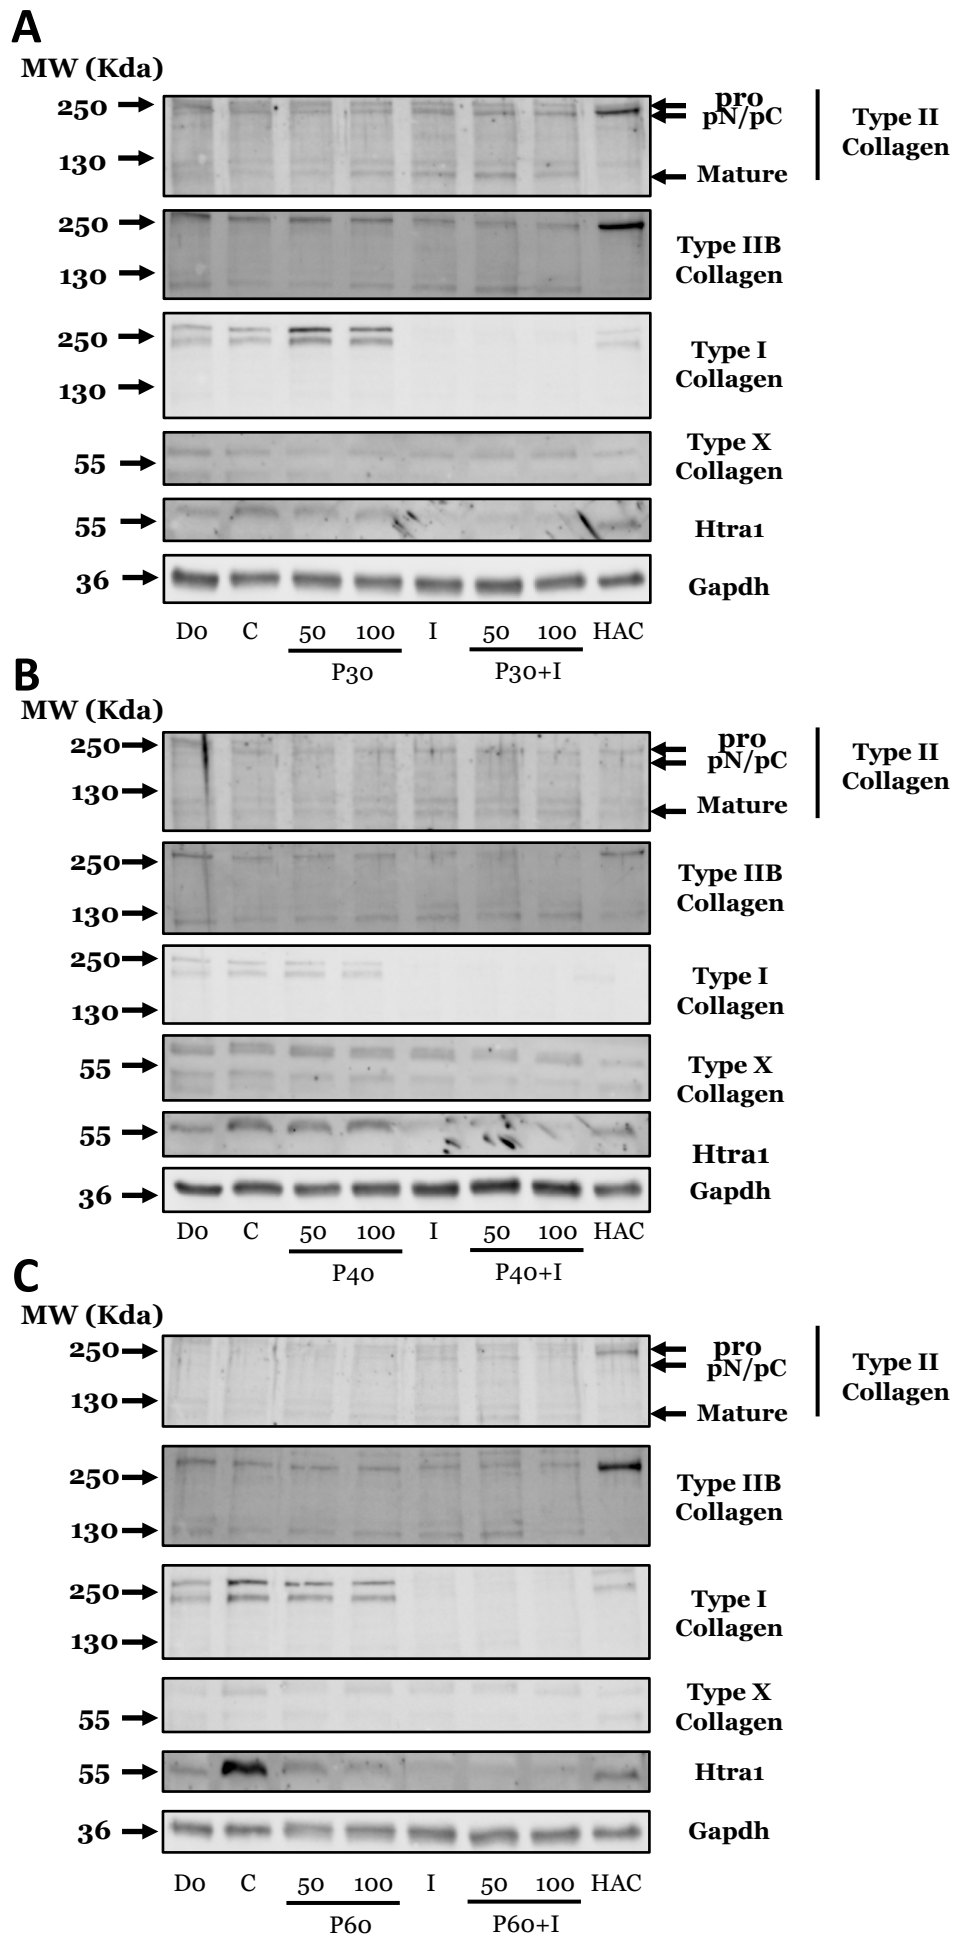

**Figure S12: Under-exposure of the blots presented in figure 10.**

Under-exposure (A, B, C) are shown. The molecular weight marker (MW kDa) is indicated on the left for the images presented.

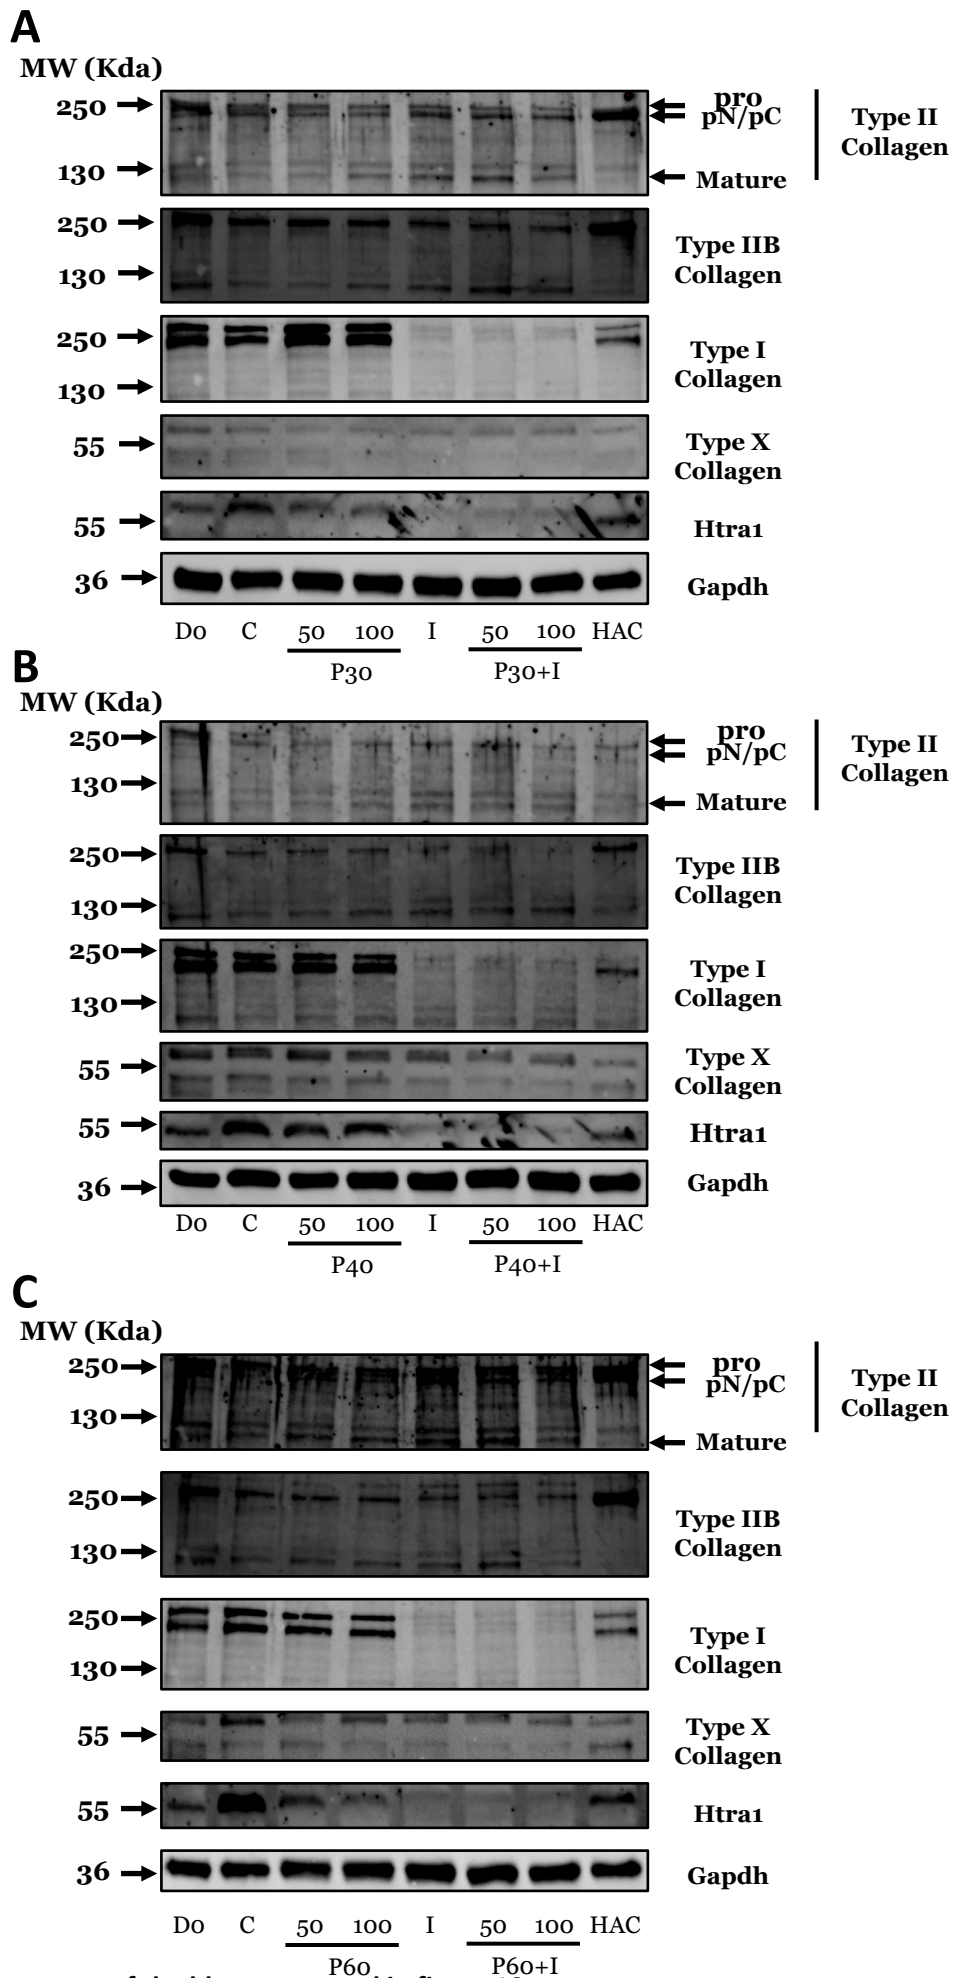

**Figure S13: Over-exposure of the blots presented in figure 10.**

Over-exposure (A, B, C) are shown. The molecular weight marker (MW kDa) is indicated on the left for the images presented.

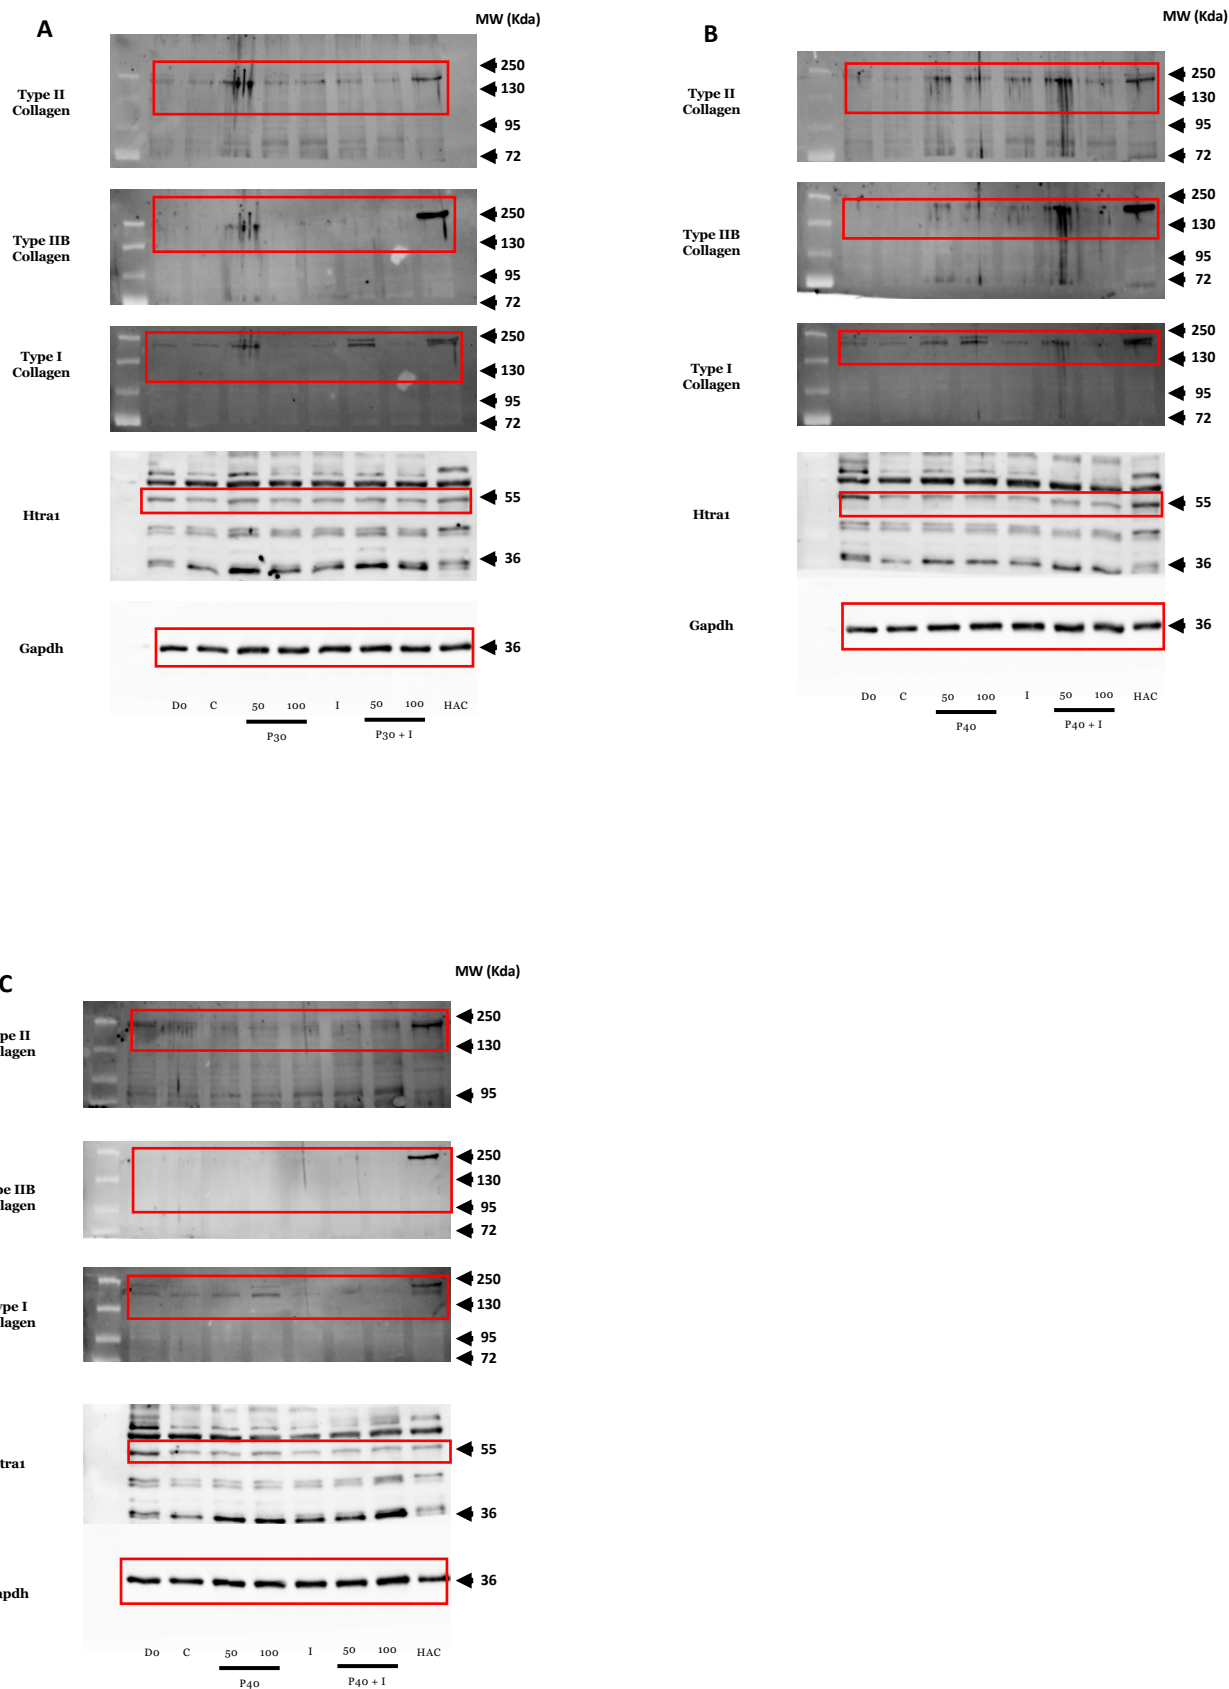

**Figure S14: Complete gel and PVDF membranes analyzed in the western-blot.**

For the western-blot presented in figure S8, respectively A, B and C, the complete images of the membranes captured with Chemidoc MP Imaging System (Bio-Rad) are shown. The molecular weight marker (MW kDa) is indicated on the right for the images shown. The cropped images are highlighted in the red lines.

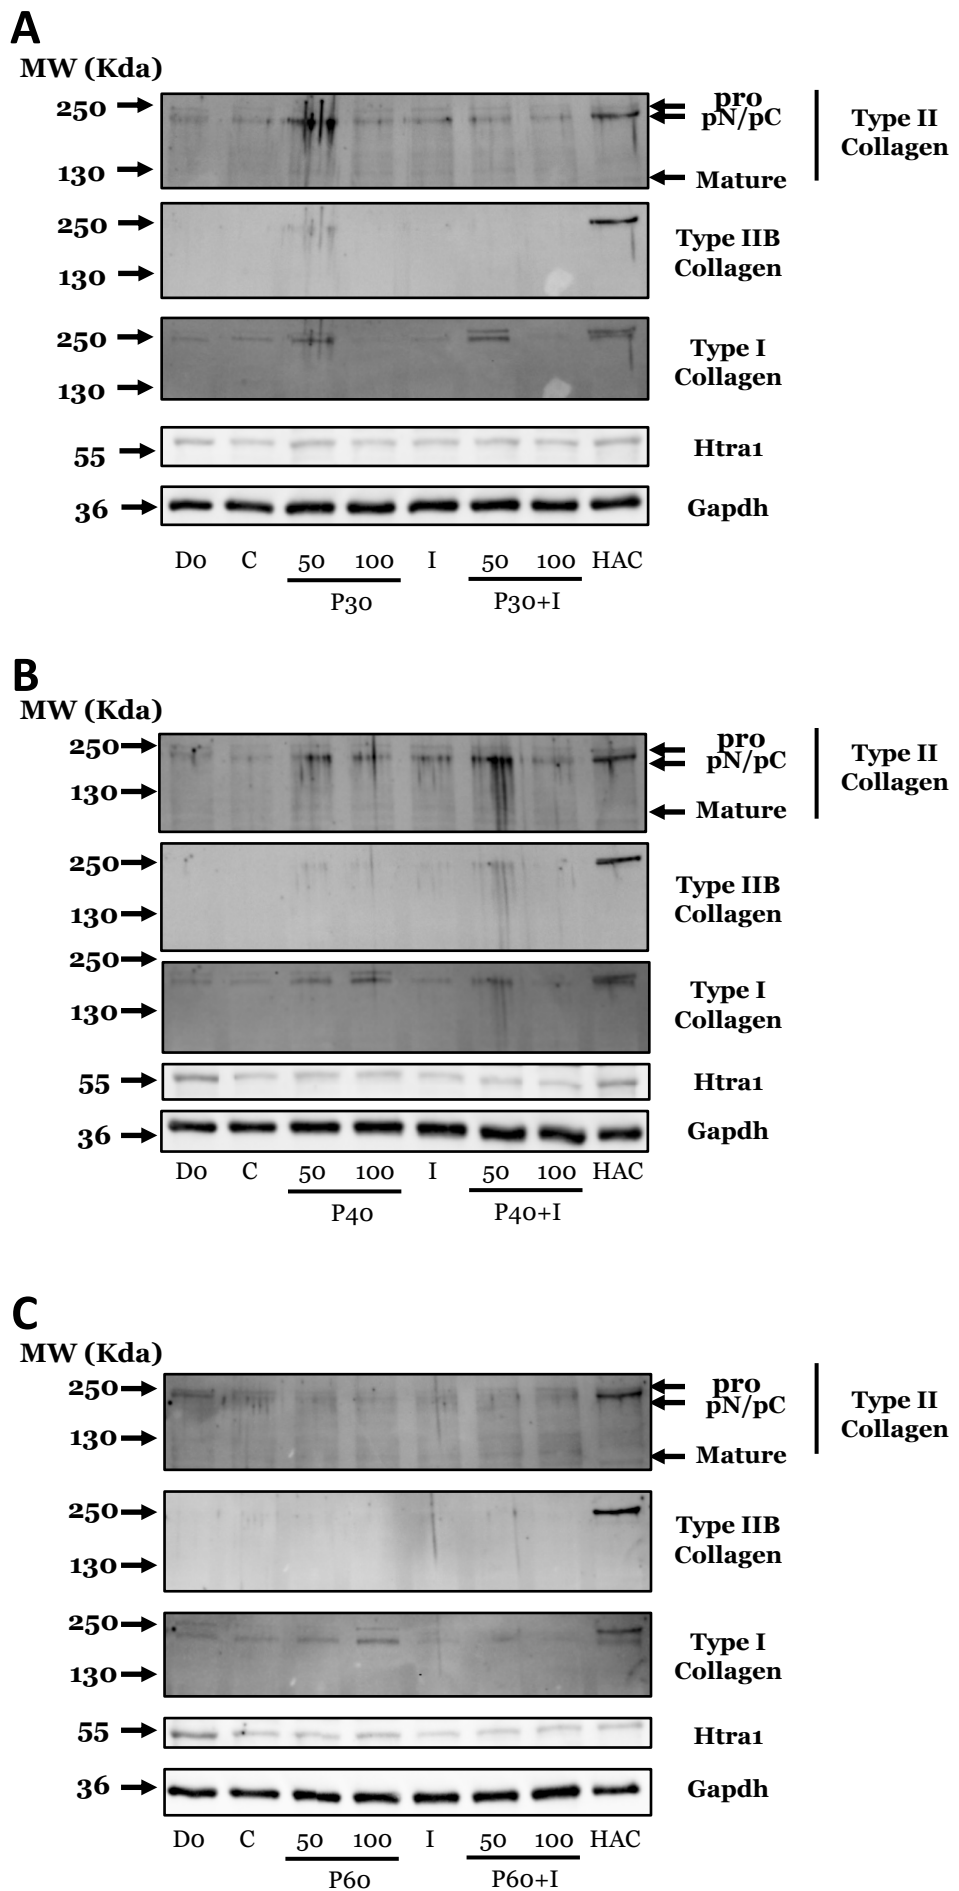

**Figure S15: Under-exposure of the blots presented in figure S8.**

Under-exposure (A, B, C) are shown. The molecular weight marker (MW kDa) is indicated on the left for the images presented.



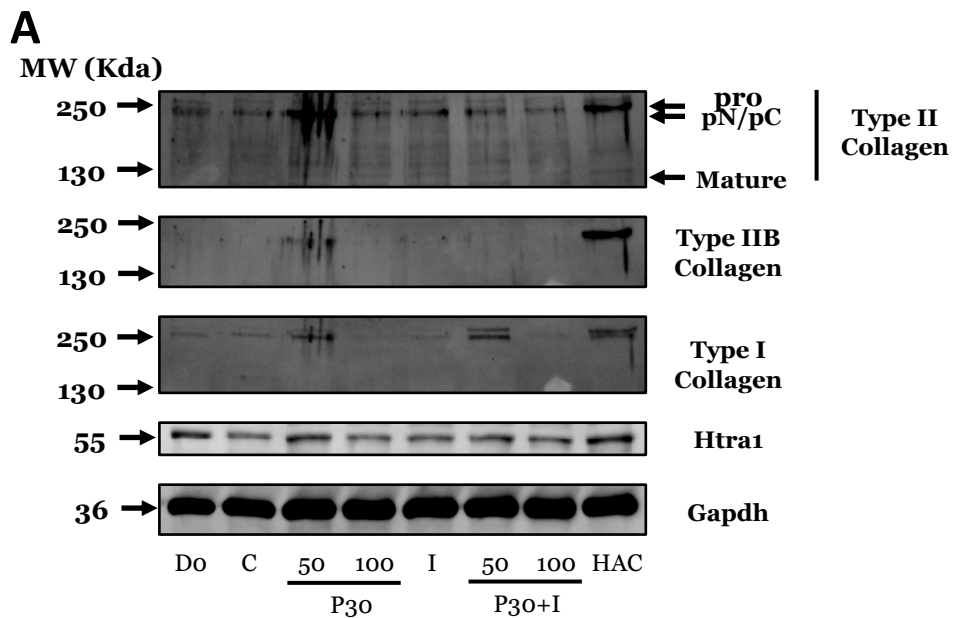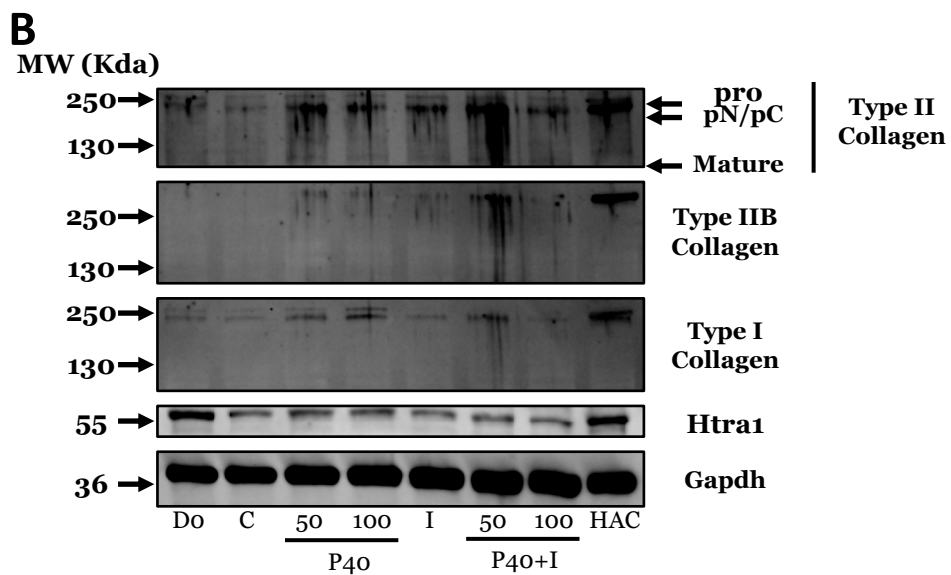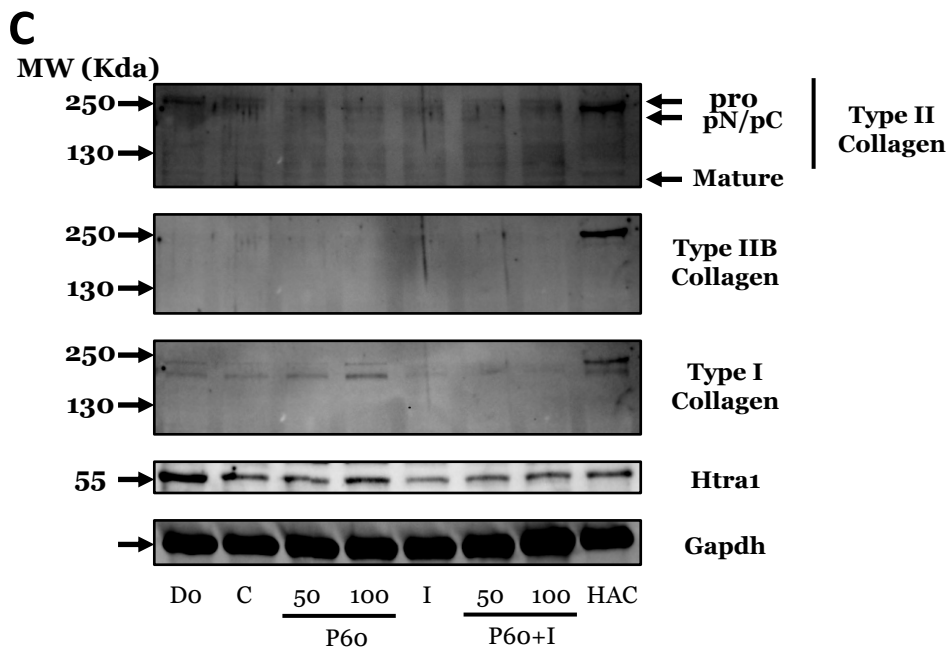

**Figure S16: Over-exposure of the blots presented in figure S8.**

Over-exposure (A, B, C) are shown. The molecular weight marker (MW kDa) is indicated on the left for the images presented.

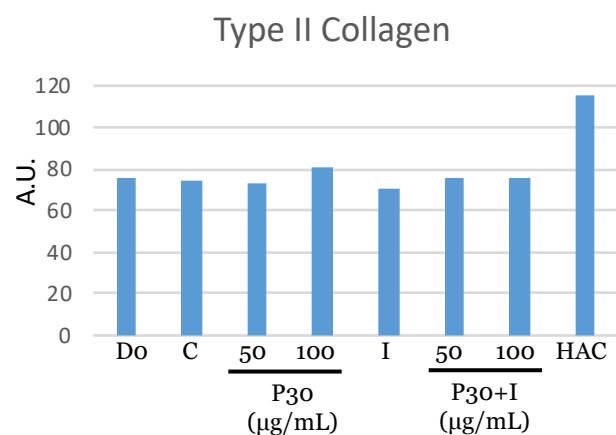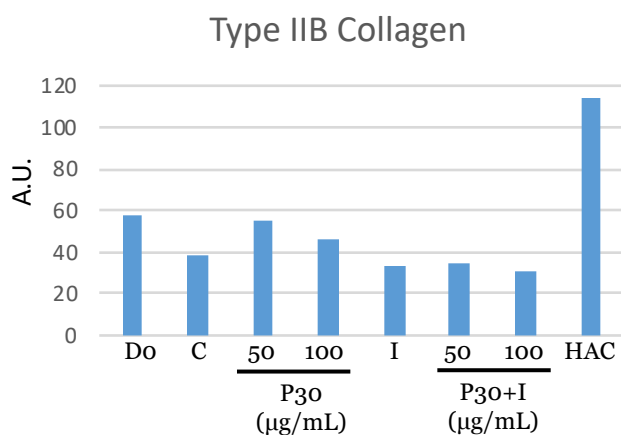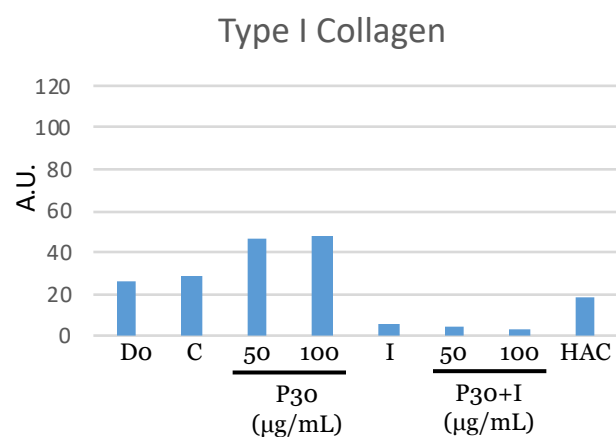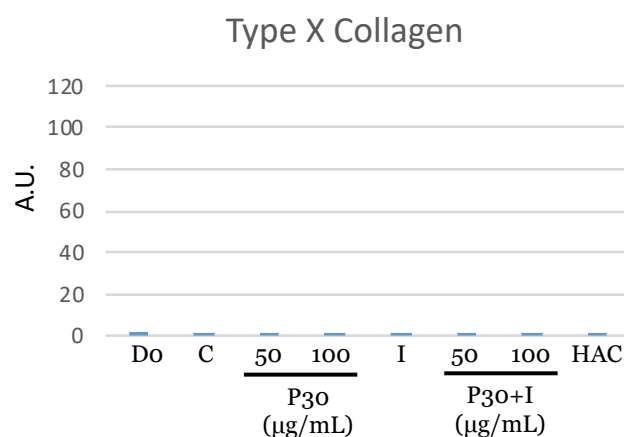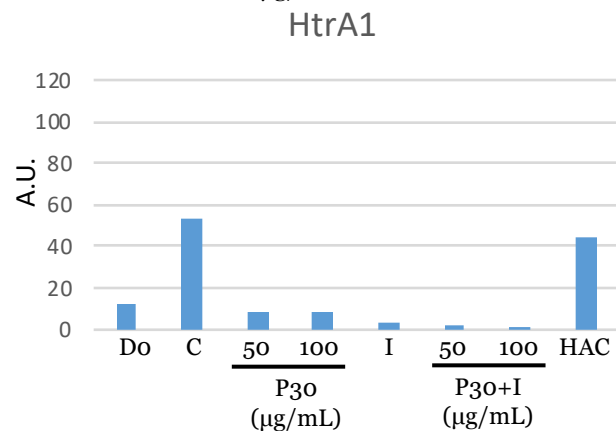

**Figure S17A: Quantification of type II, IIB, I and X collagens and of Htra1 western-blot presented in Figure 10A.** Protein expression was measured by quantifying the density of immunoblots bands calculated relative to GAPDH using image analysis software ImageJ®. A.U.: Arbitrary Unit.

Type II Collagen

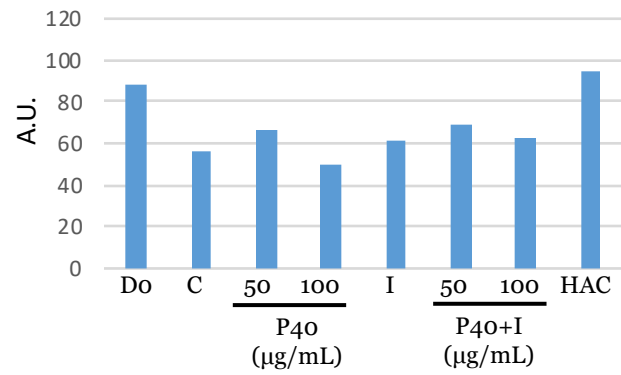

Type IIB Collagen

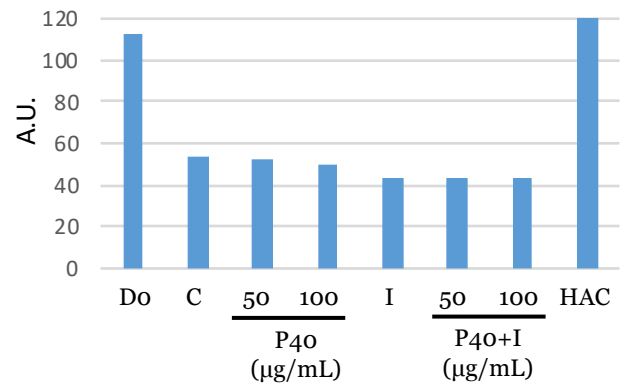

Type I Collagen

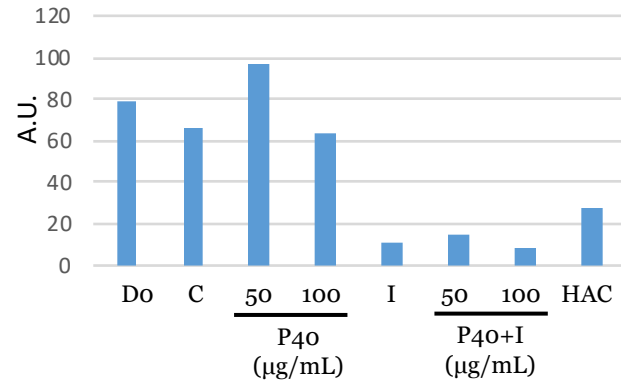

Type X Collagen

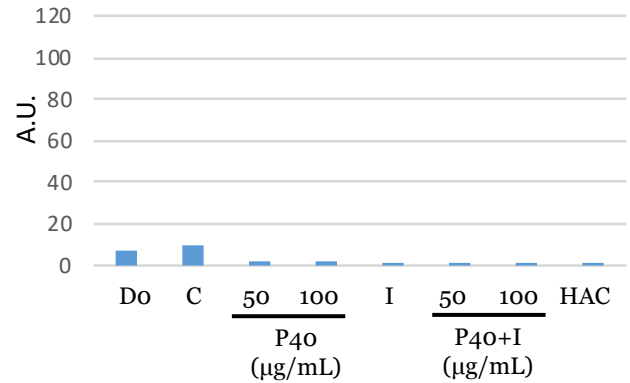

Htra1

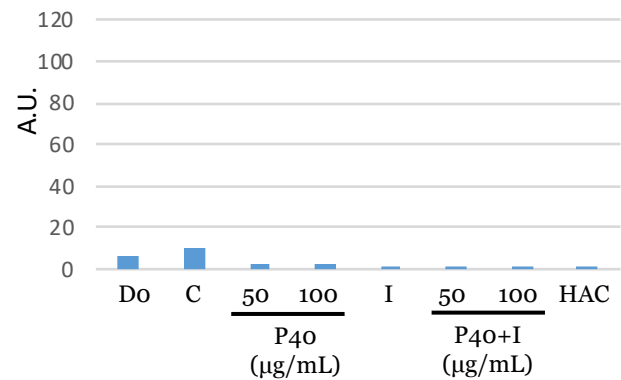

**Figure S17B: Quantification of type II, IIB, I and X collagens and of Htra1 western-blots presented in Figure 10B.** Protein expression was measured by quantifying the density of immunoblots bands calculated relative to GAPDH using image analysis software ImageJ®. A.U.: Arbitrary Unit.

Type II Collagen

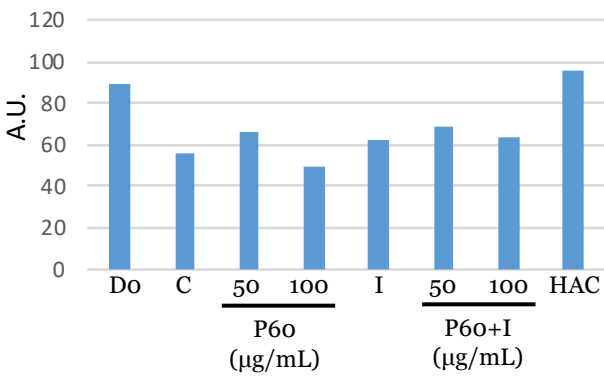

Type IIB Collagen

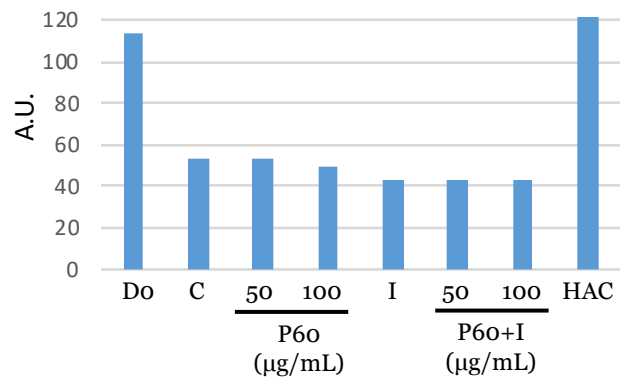

Type I Collagen

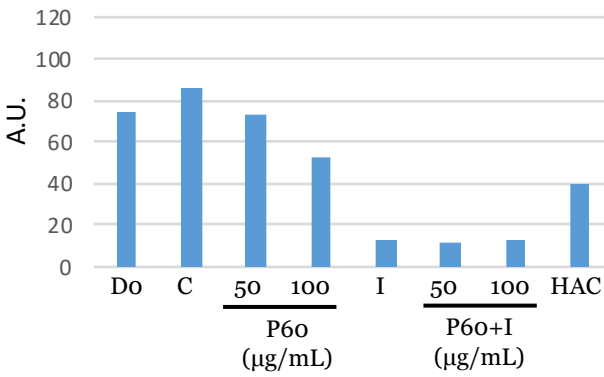

Type X Collagen

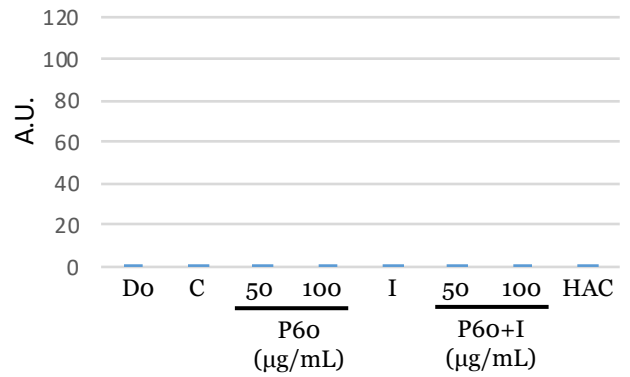

HtraA1

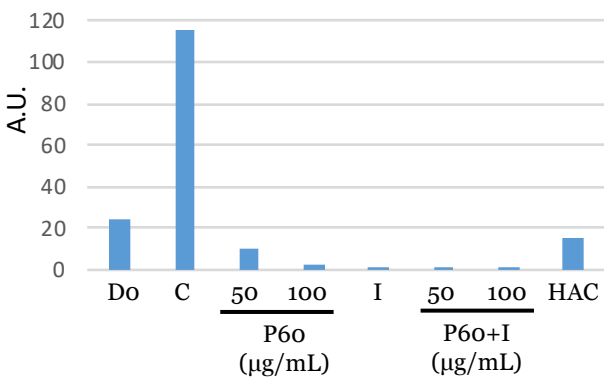

**Figure S17C: Quantification of type II, IIB, I and X collagens and of Htra1 western-blots presented in Figure 10C.** Protein expression was measured by quantifying the density of immunoblots bands calculated relative to GAPDH using image analysis software ImageJ®. A.U.: Arbitrary Unit.

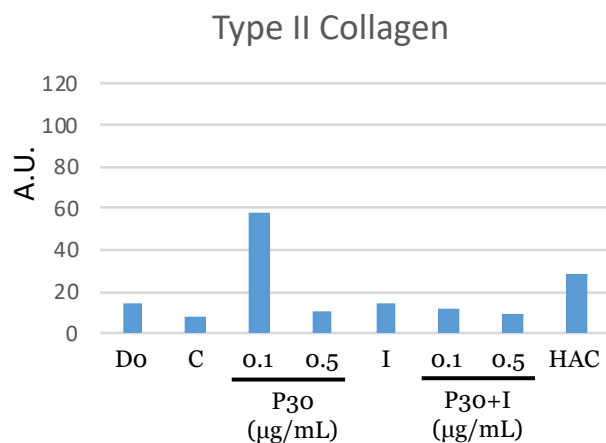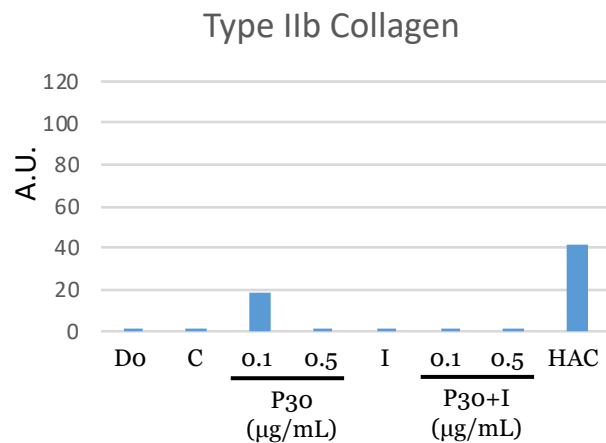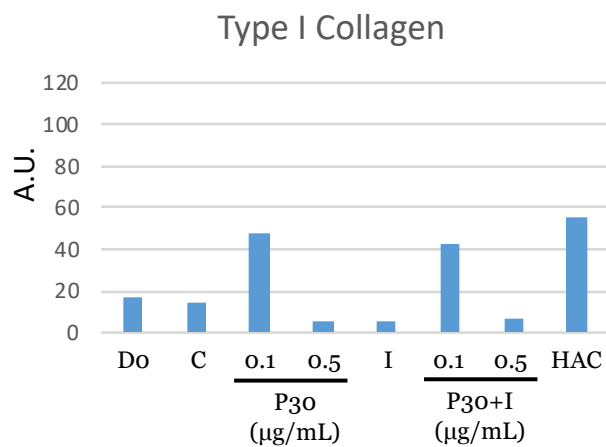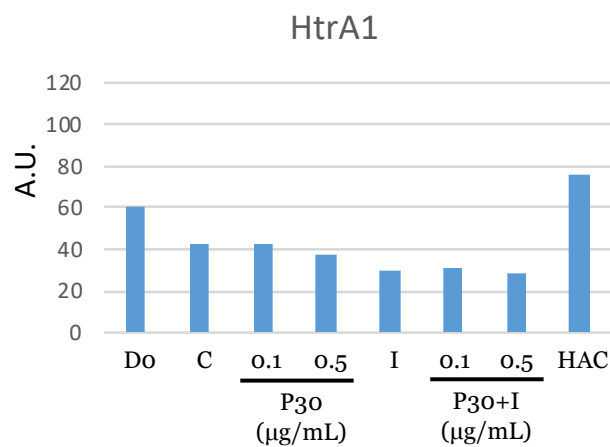

**Figure S18A: Quantification of type II, IIB and I collagens and of Htra1 immunoblots presented in Figure S8A.** Protein expression was measured by quantifying the density of immunoblots bands calculated relative to GAPDH using image analysis software ImageJ®. A.U.: Arbitrary Unit.

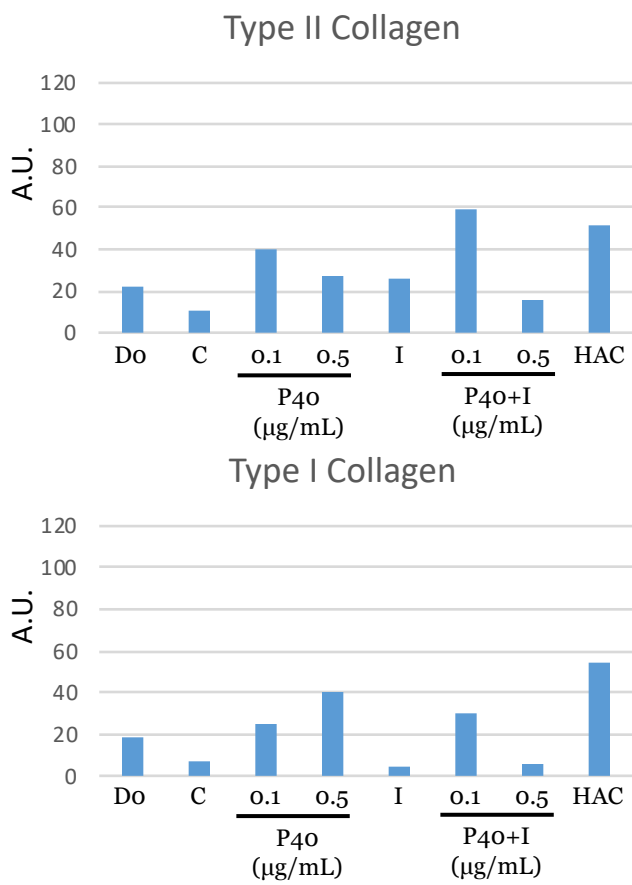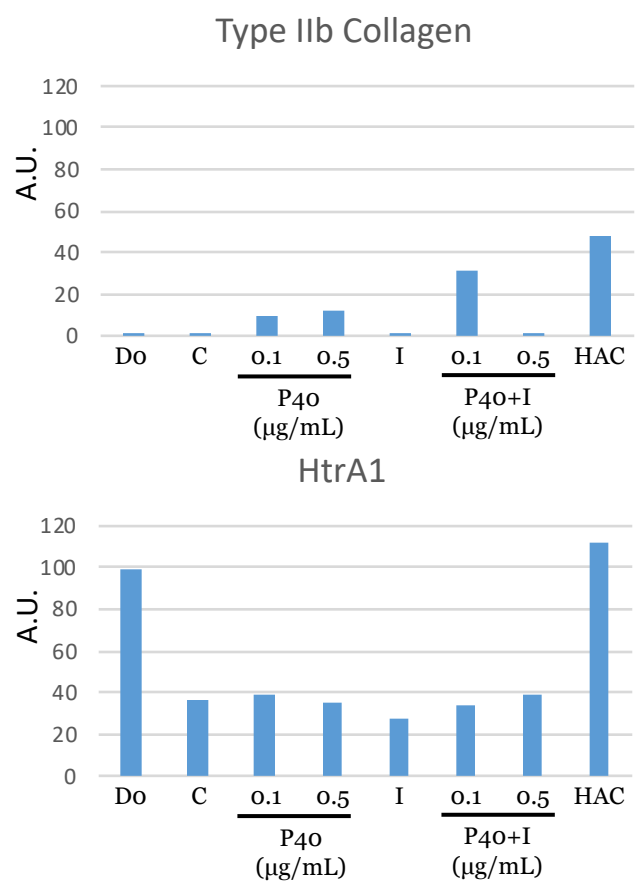

**Figure S18B: Quantification of type II, IIB and I collagens and of Htra1 immunoblots presented in Figure S8B.** The relative densitometry values (calculated relative to GAPDH) were determined using ImageJ® software. A.U.: Arbitrary Unit.

Type II Collagen

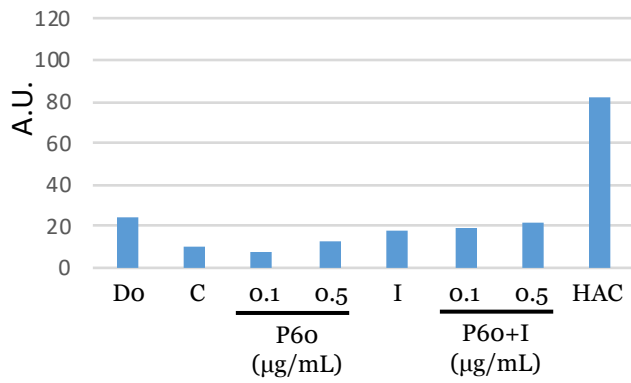

Type IIB Collagen

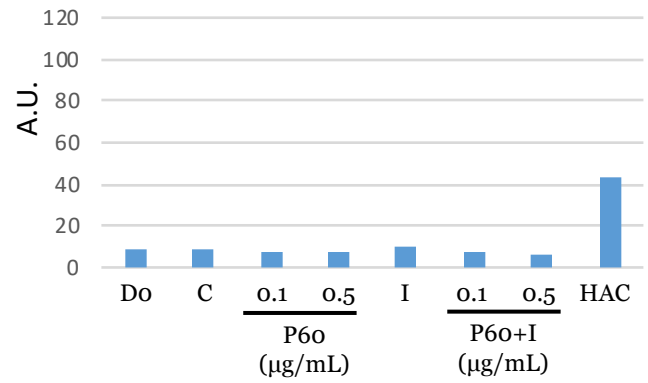

Type I Collagen

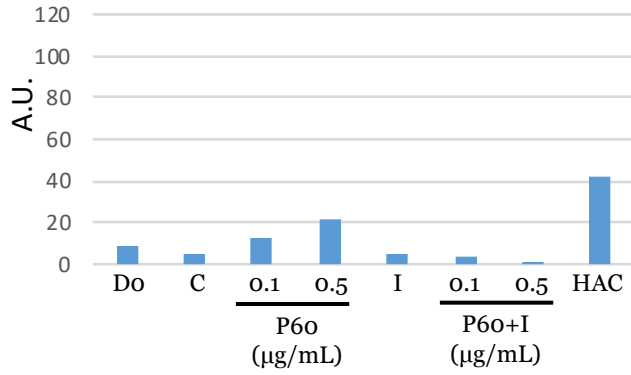

Htra1

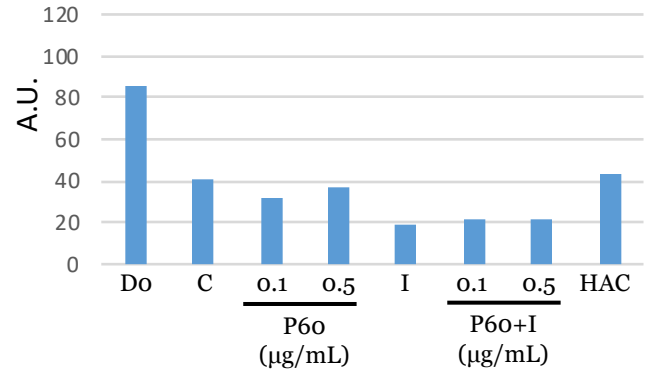

**Figure S18C: Quantification of type II, IIB and I collagens and of Htra1 immunoblots presented in Figure S8C.** The relative densitometry values (calculated relative to GAPDH) were determined using ImageJ® software. A.U.: Arbitrary Unit.

| Gene           | Sequence Forward          | Sequence Reverse         |
|----------------|---------------------------|--------------------------|
| <i>ACAN</i>    | TCGAGGACAGCGAGGCC         | TCGAGGGTGTAGCGTGTAGAGA   |
| <i>β-ACTIN</i> | CCGCGAGCACAGAGCCTCGCCTT   | GGCCTTGCACATGCCGGAGCCGT  |
| <i>ADAMTS5</i> | CCTCTCCCATGACGATTCCA      | TGCTTTCGTGGTAGGTCCAG     |
| <i>BGLAP</i>   | GCAGCGAGGTAGTGAAGAGAC     | AGCAGAGCGACACCCTA        |
| <i>COL1A1</i>  | TGAGCCAGCAGATCGAGA        | ACCAGTCTCCATGTTGCAGA     |
| <i>COL1A2</i>  | TGTGGATACGCGGACTTTGT      | CAGCAAAGTTCACCGAGA       |
| <i>COL2A1</i>  | GGCAATAGCAGGTTACGTACA     | CGATAACAGTCTTGCCCCACTT   |
| <i>COX-2</i>   | CCCTTCTGCCTGACACCTT       | ACTTTCTGTACTGCGGGTGG     |
| <i>GAPDH</i>   | CCTGCACCACCAACTGCTTA      | GGCCATCCACAGTCTTCTGGG    |
| <i>HTRA1</i>   | GACTACATCCAGACCGACGC      | GCTTTTCCTTTGGCCTGTCTG    |
| <i>INOS</i>    | ACATTCTGCTTCTGGAAACTA     | CGCTACAACATCCTGGAG       |
| <i>MMP1</i>    | GGCCCAAAACCCCAAAAG        | ATCTCTGTCGGCAAATTCGTAAGC |
| <i>MMP13</i>   | CCCCAACCTAAACATCCAAAAAC   | TTAAAAACAGTCCGCATCAACCT  |
| <i>MMP14</i>   | GCCGGGGCATCCAGCAACTTTA    | TCCTCACCCGCCAGAACCAG     |
| <i>MMP9</i>    | TGCCCGGACCAAGGATACAGTTT   | AGGCCGTGGCTCAGGTTCAAG    |
| <i>P21</i>     | CATGTGGACCTGTCACTGTCTTGTA | GAAGATCAGCCGGCGTTTG      |
| <i>P53</i>     | CCCCAGCCAAAGAAGAAAC       | AACATCTCGAAGCGCTCAC      |
| <i>P65</i>     | GCACAGATACCACCAAGACC      | TCAGCCTCATAGAAGCCATC     |
| <i>PCNA</i>    | GGCCGAAGATAACGCGGATAC     | GGCATATACGTGCAAATTCACCA  |
| <i>PPIA</i>    | CGGATTTGATCATTGTTGGT      | CAGGGAATACGTAACCAG       |
| <i>PRG4</i>    | GAACGTGCTATAGGACCTTC      | CAGACTTTGGATAAGGTCTGCC   |
| <i>RUNX2</i>   | AGCCTTACCAAACAACACACCAG   | CCATATGTCCTCTCAGCTCAGC   |
| <i>SOX9</i>    | GTACCCGCACTTGCACAAC       | TCGCTCTCGTTCAGAAGTCTC    |
| <i>SPP1</i>    | TGGAAAGCGAGGAGTTGAATGG    | GCTCATTGCTCTCATCATTGGC   |

**Table S1: Oligonucleotides used in RT-qPCR experiments.**



| <b>Antibody</b>   | <b>supplier</b>                           | <b>Dilution</b> |
|-------------------|-------------------------------------------|-----------------|
| Type IIB collagen | Covalab, Villeurbanne, France             | 1/1500          |
| Type II collagen  | Novotec, Bron, France                     | 1/1500          |
| Type I collagen   | Novotec, Bron, France                     | 1/1500          |
| Type X collagen   | Sigma-Aldrich, St. Louis, MO, USA         | 1/1000          |
| Htra1             | ABGENT, San Diego, CA, USA                | 1/3000          |
| GAPDH             | Santa Cruz Biotechnology, Dallas, TX, USA | 1/5000          |

**Table S2: Antibodies used in the western-blots.**
